# Supplementary material for: Nonclassical autophagy activation pathways are essential for production of infectious Influenza A virus in vitro
Source: PubMed Central journal article supplement — Mol Microbiol. 2022 Jan 6;117(2):508–24. doi: 10.1111/mmi.14865 (PMC9305535; doi:10.1111/mmi.14865), 2022-01-06
Supplement: MMI-117-508-s001.pdf [file MMI-117-508-s001.pdf]

### Western Blots for Figure 3

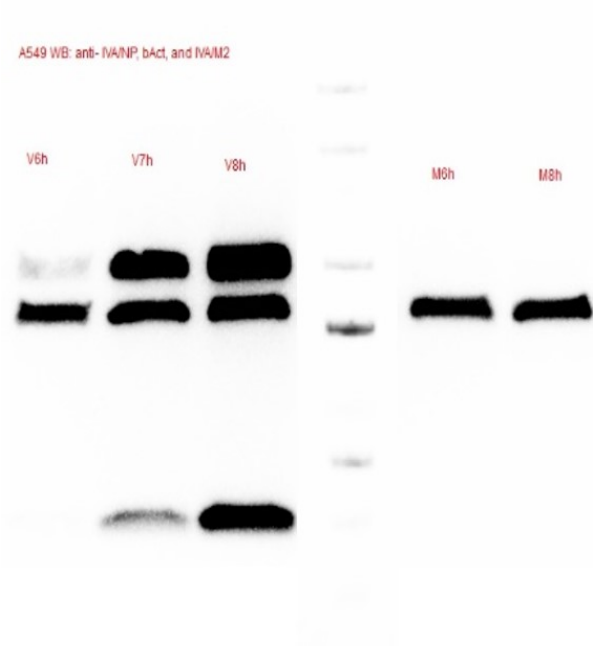

Fig3A-IVA/NP and IVA/M2 in A549 not treated with ULK1h

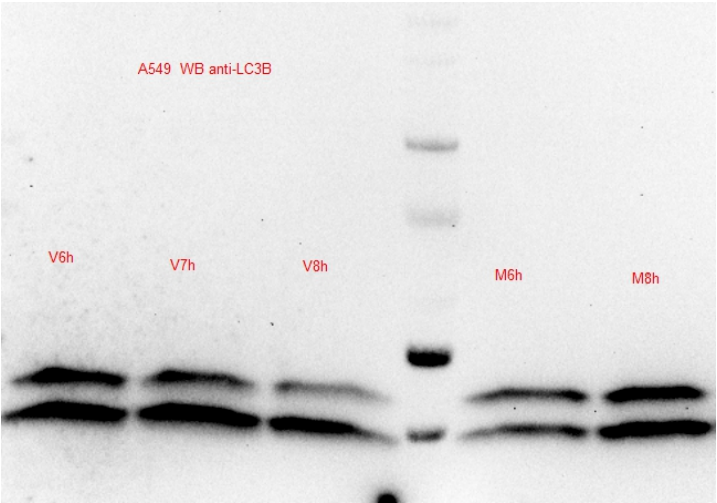

Fig3A-LC3B in A549 not treated with ULK1h

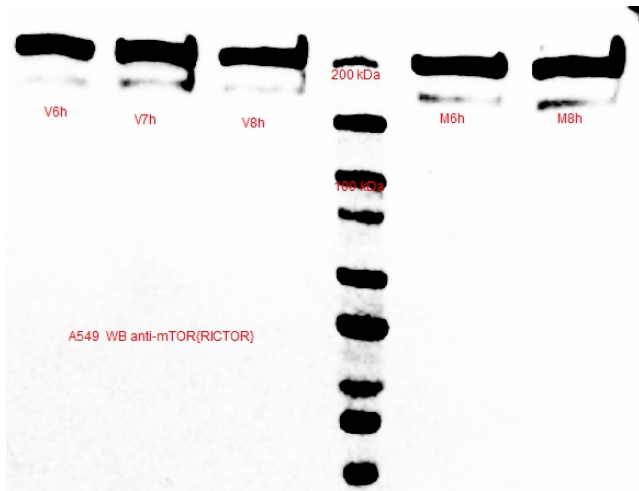

Fig.3A-mTOR total protein in A549 not treated with ULKinh

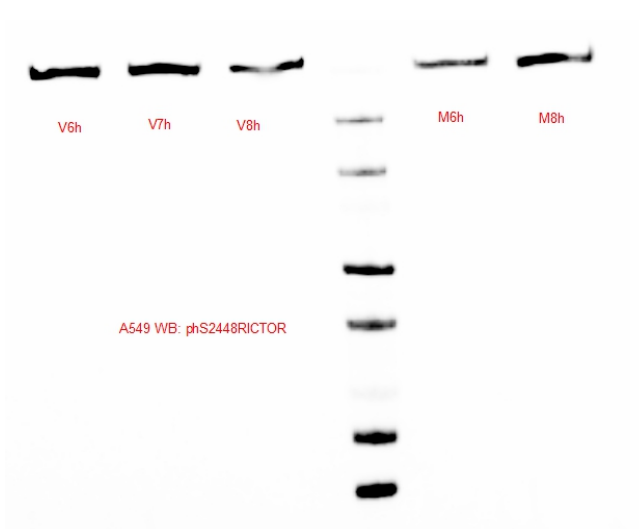

Fig.3A-mTOR/phS2448 in A549 not treated with ULKinh

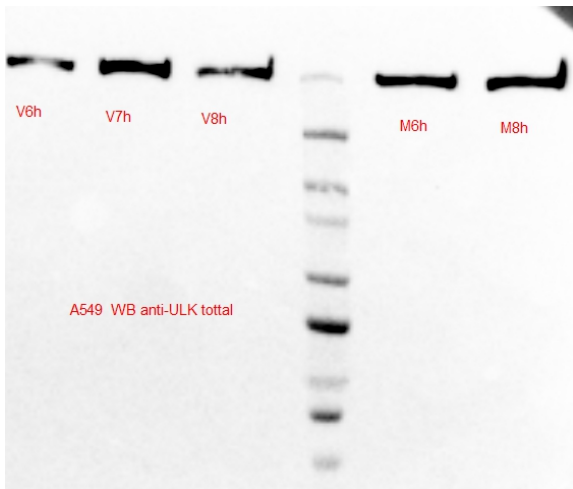

Fig.3A-ULK1 total protein in A549 not treated with ULKinh

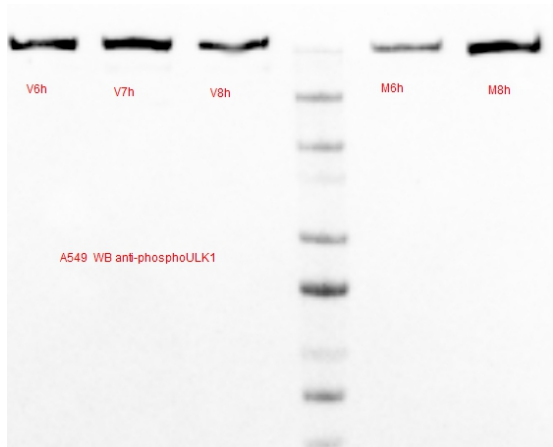

Fig.3A-ULK1/S757 in A549 not treated with ULKinh

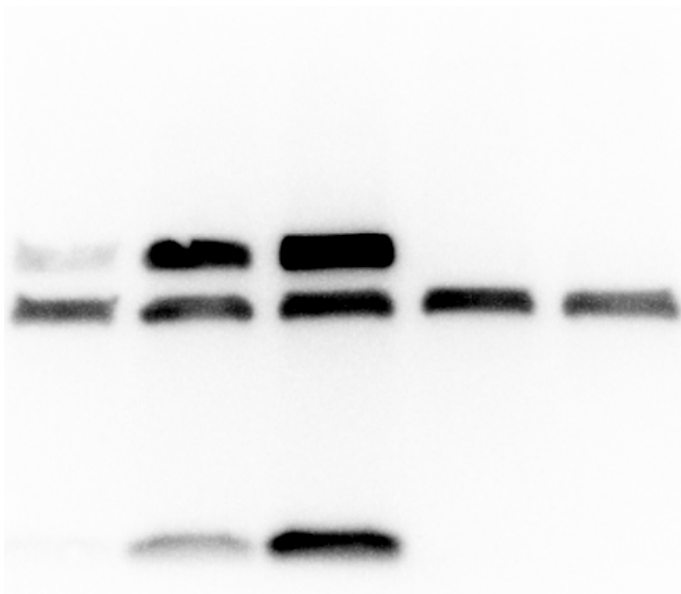

Fig3A-IVA/NP and IVA/M2 in A549 treated with ULKinh

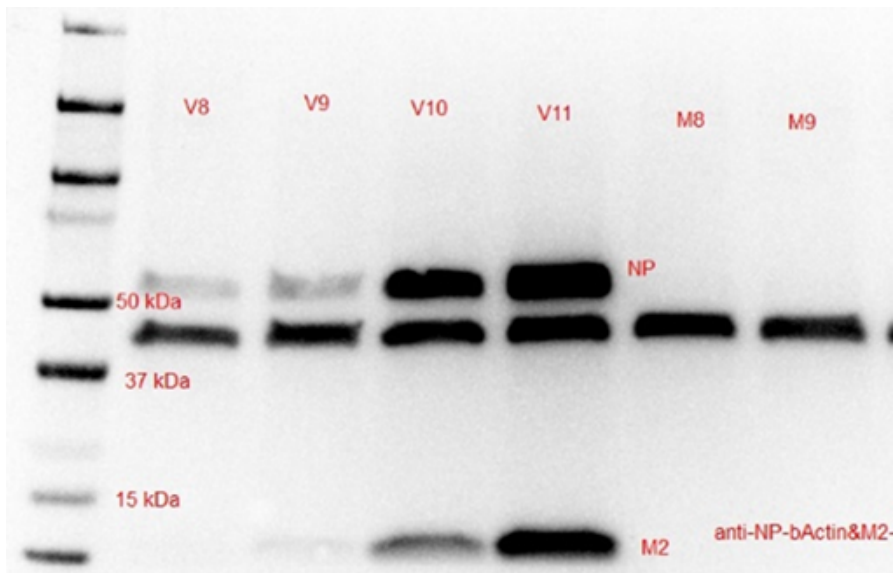

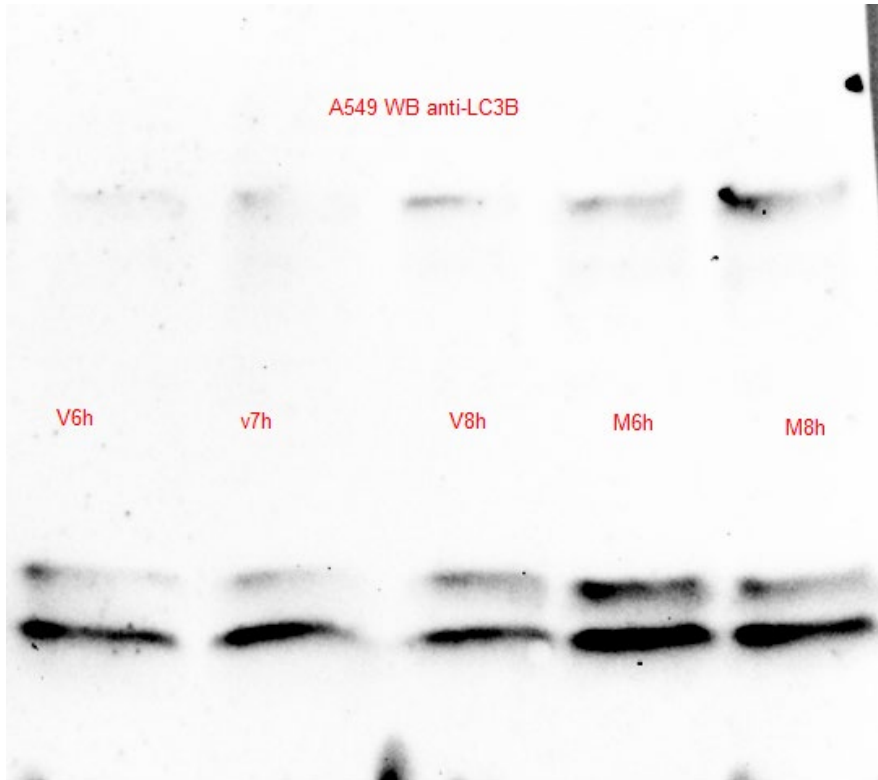

Fig3A-LC3B in A549 treated with ULKinh

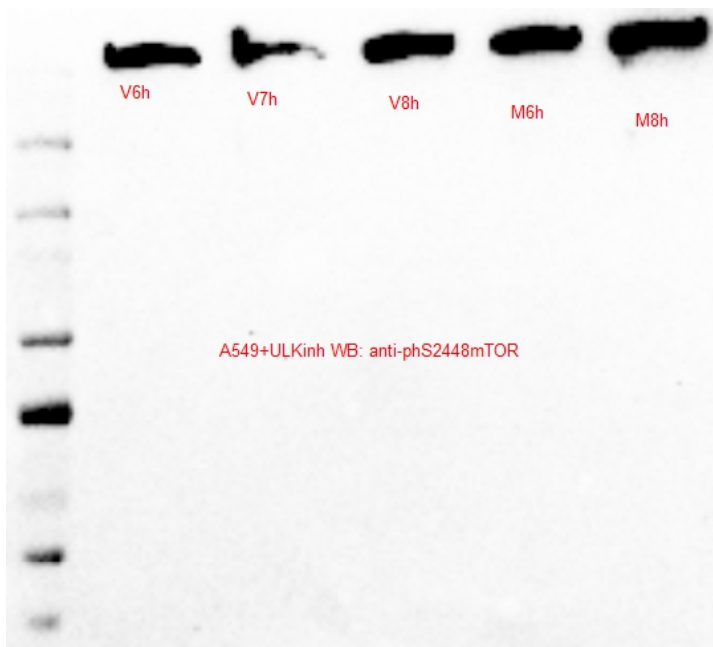

Fig3A-phS2448 mTOR in A549 treated with ULKinh

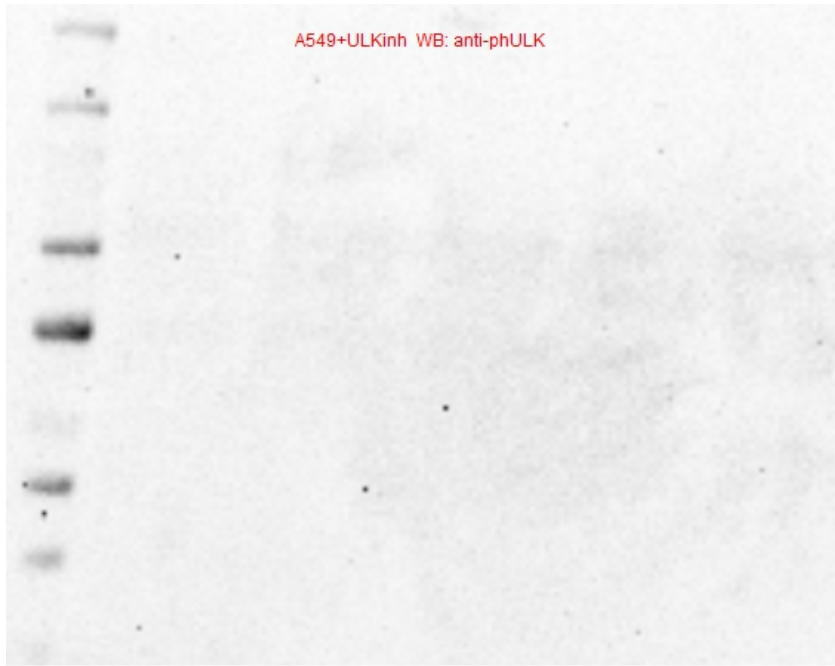

Fig.3A-ULK1/S757 in A549 treated with ULKinh

Western Blots for Figure 4

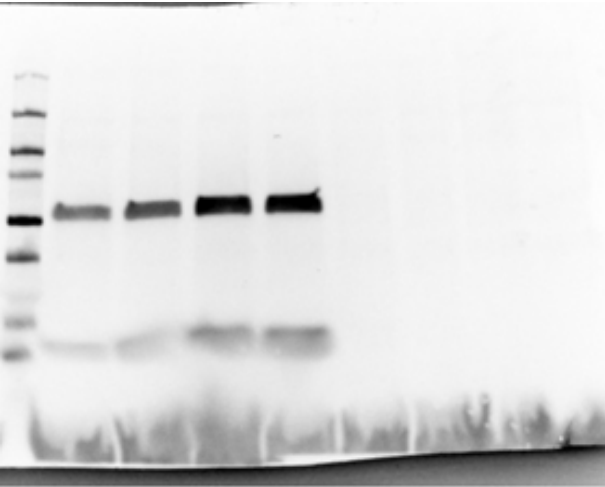

Fig.4C- WB: IVA/NP&M2

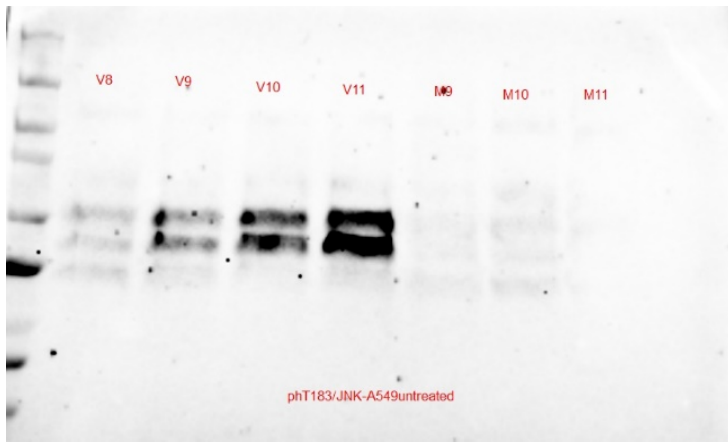

Fig.4C- WB: p-JNK

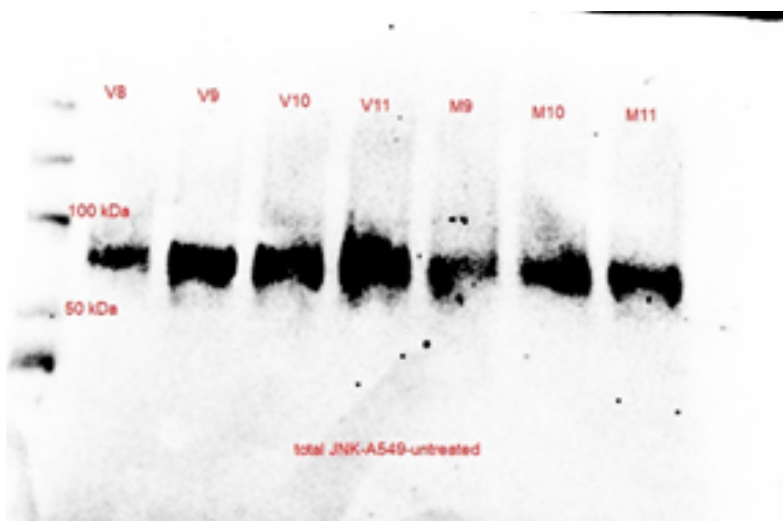

Fig.4C- WB: JNK total

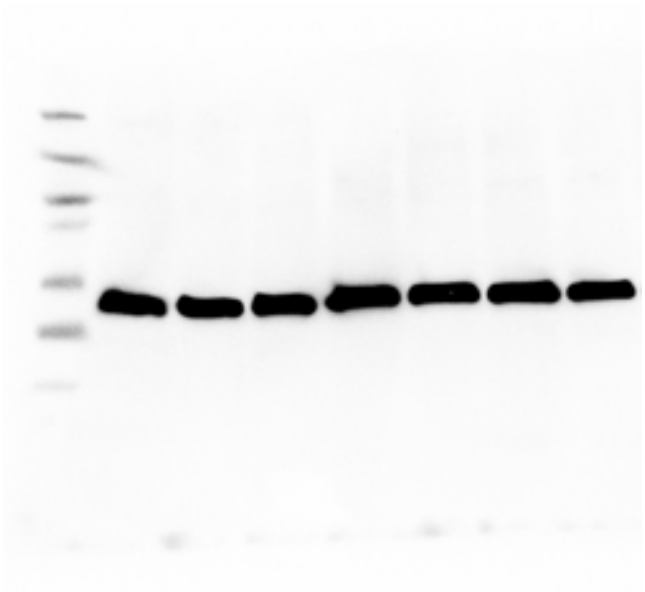

Fig.4C- WB: b-Actin

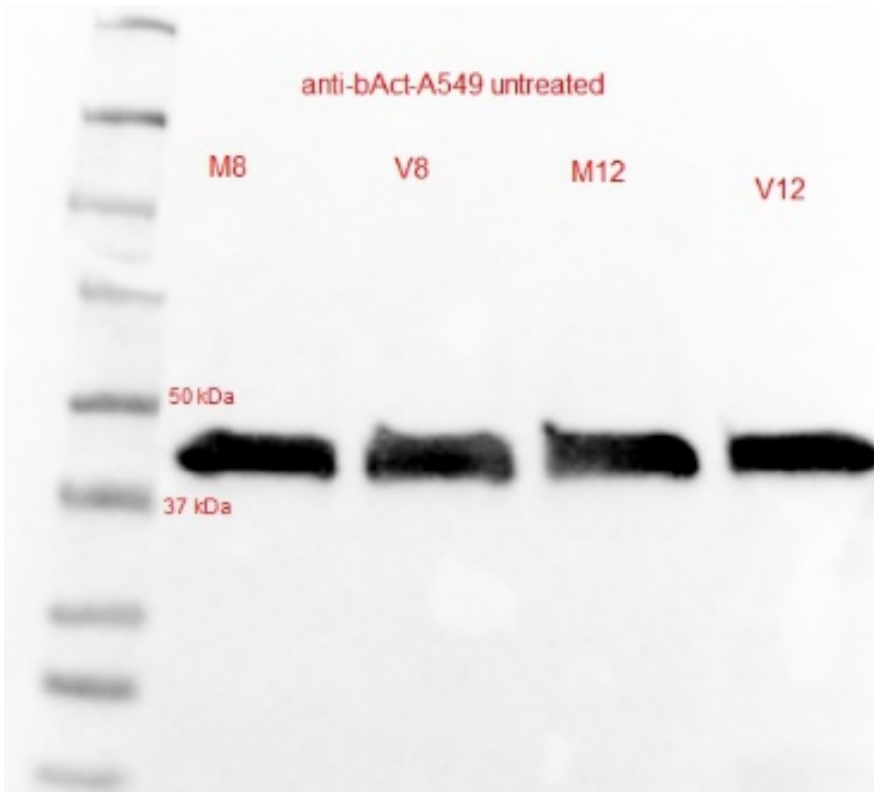

Fig.4D-WB: bAct-A549

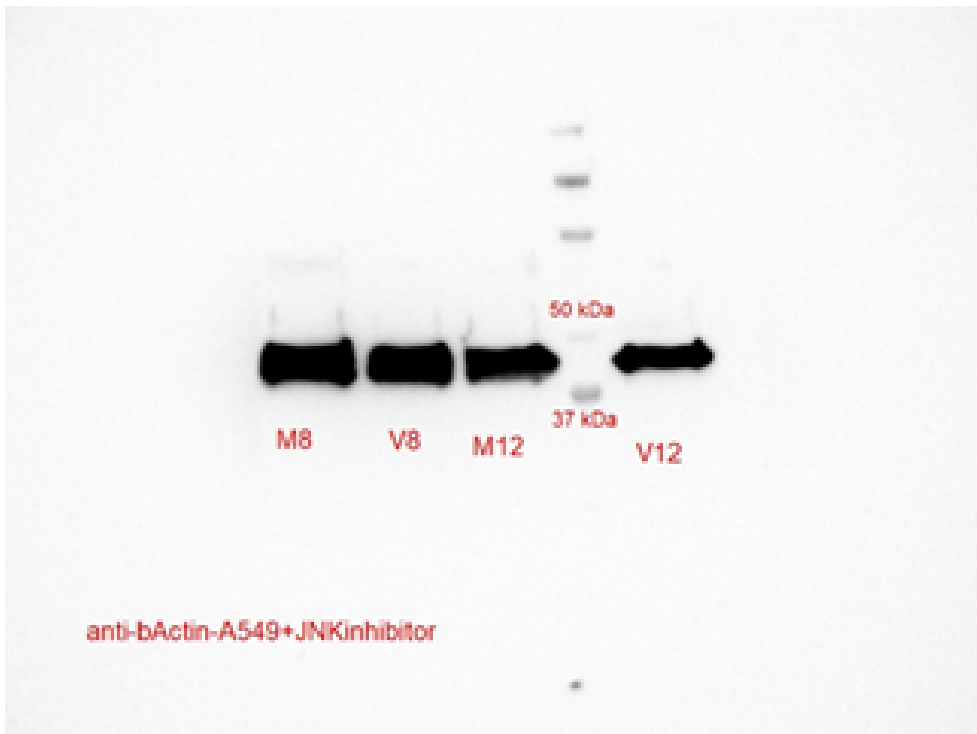

Fig.4D-WB: bAct-A549+JNKinh

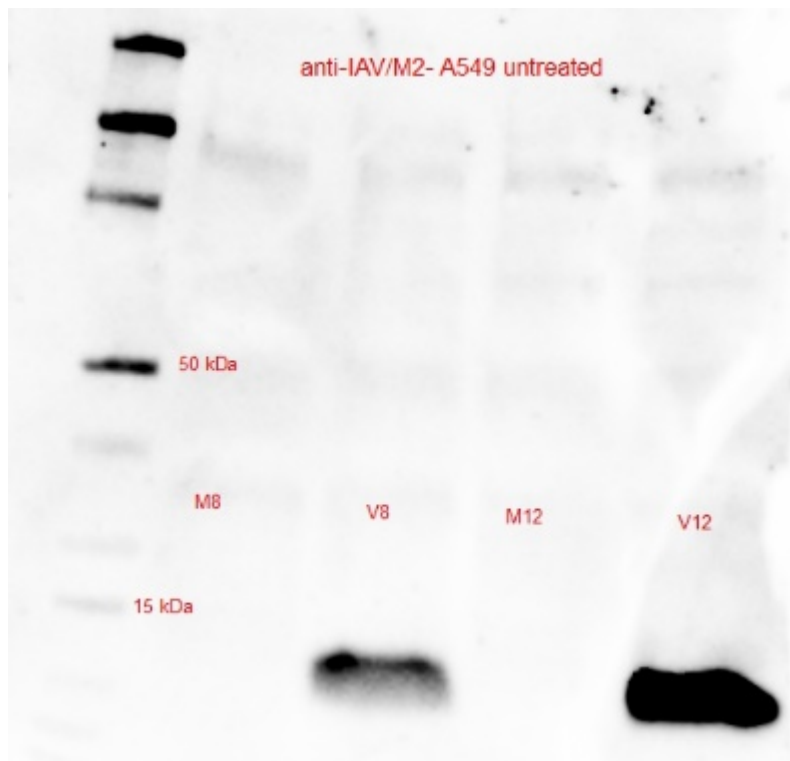

Fig.4D-WB: IVA/M2-A549

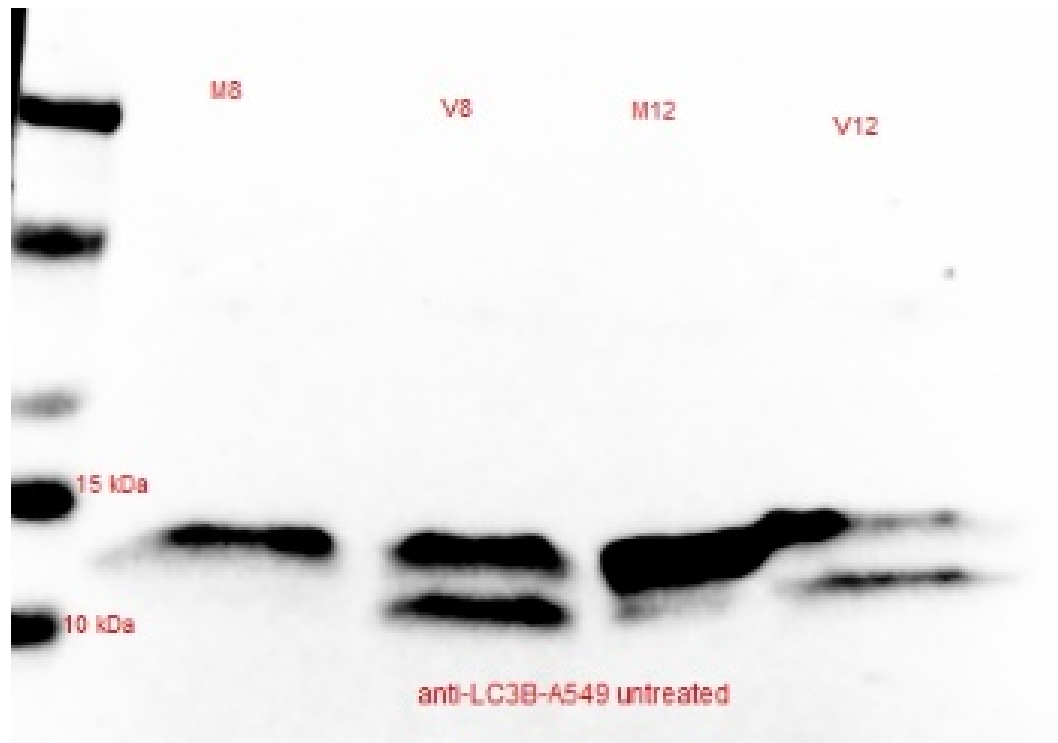

Fig.4D-WB: LC3B-A549



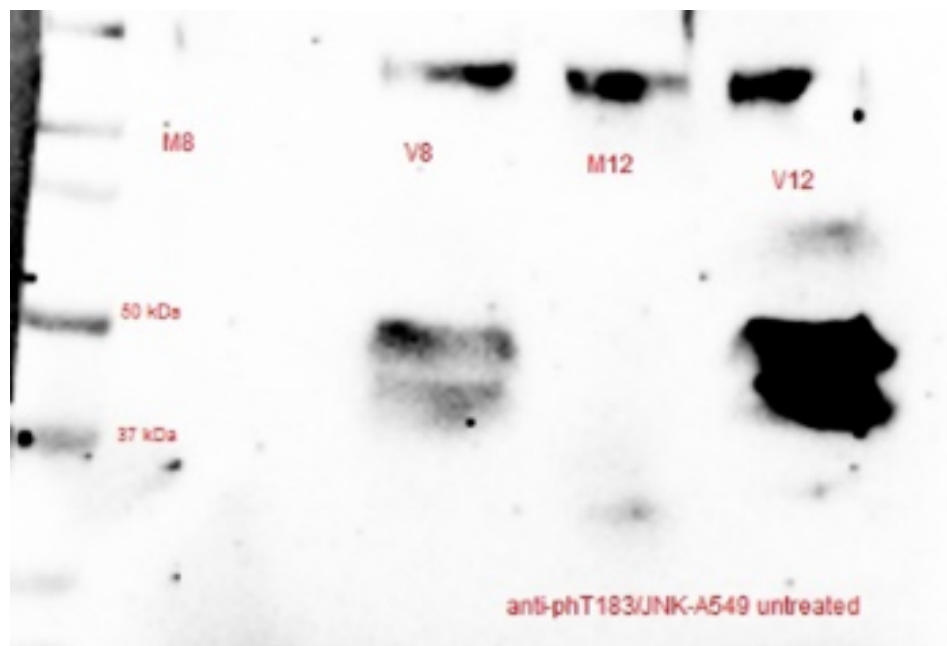

Fig.4D-WB: JNK-phT183-A549

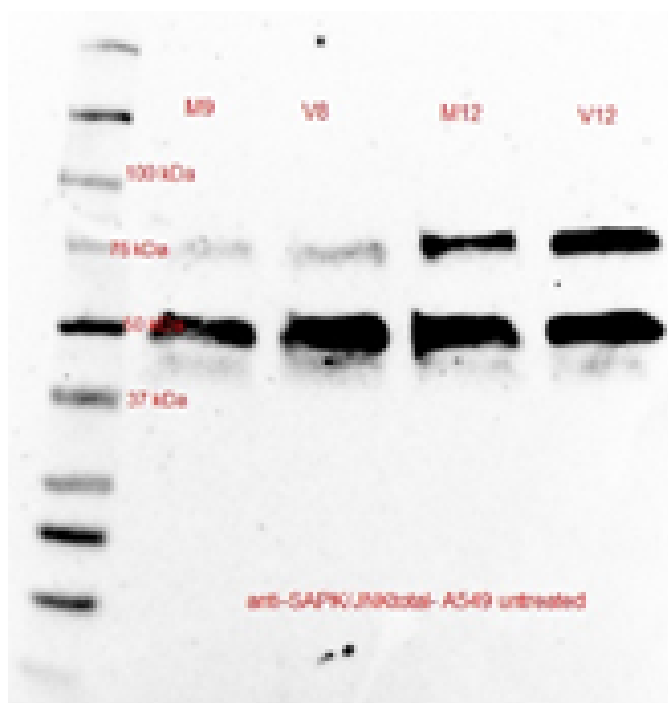

Fig.4D-WB: JNK -A549

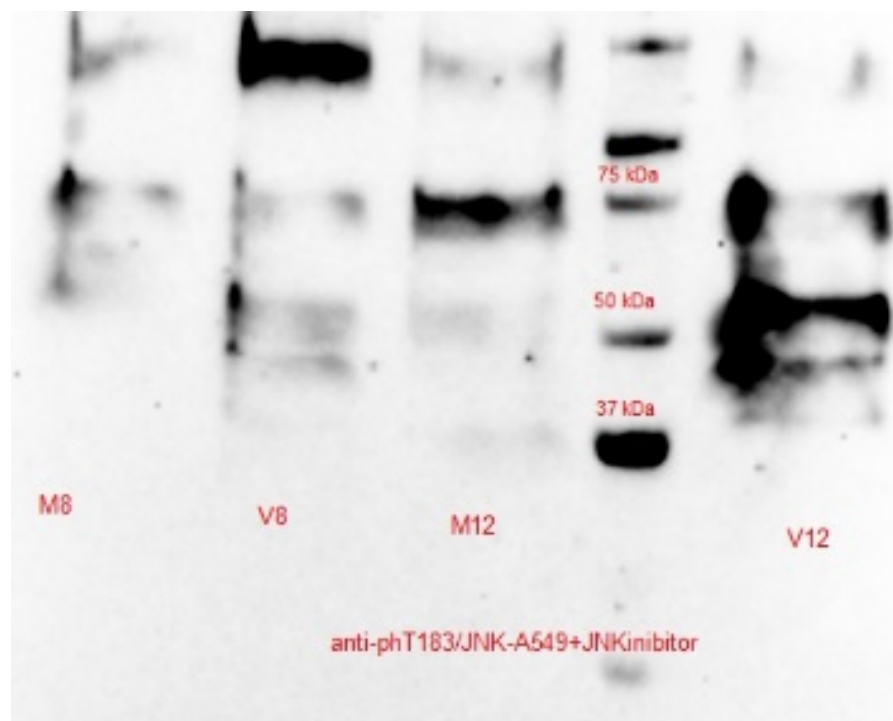

Fig.4D-WB: pJNK-A549+JNinh

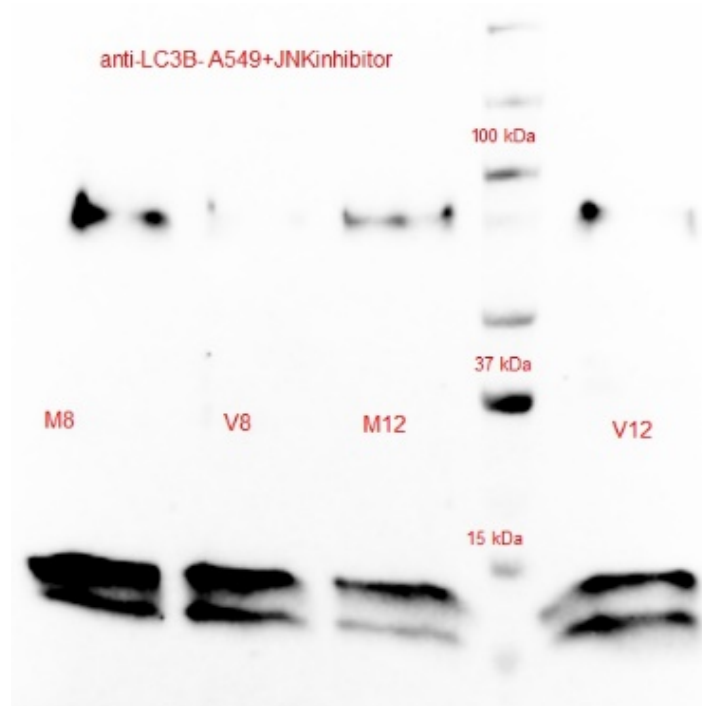

Fig.4D-WB: LC3B-A549+JNKinhibitor

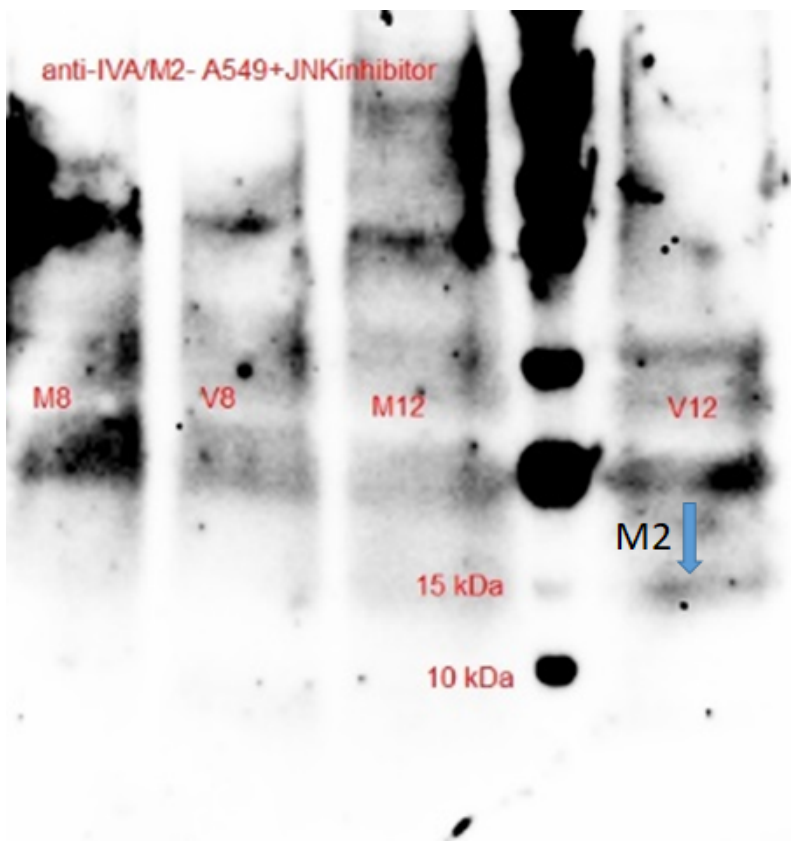

Fig.4D-WB: IVA/M2-A549+JNKinh

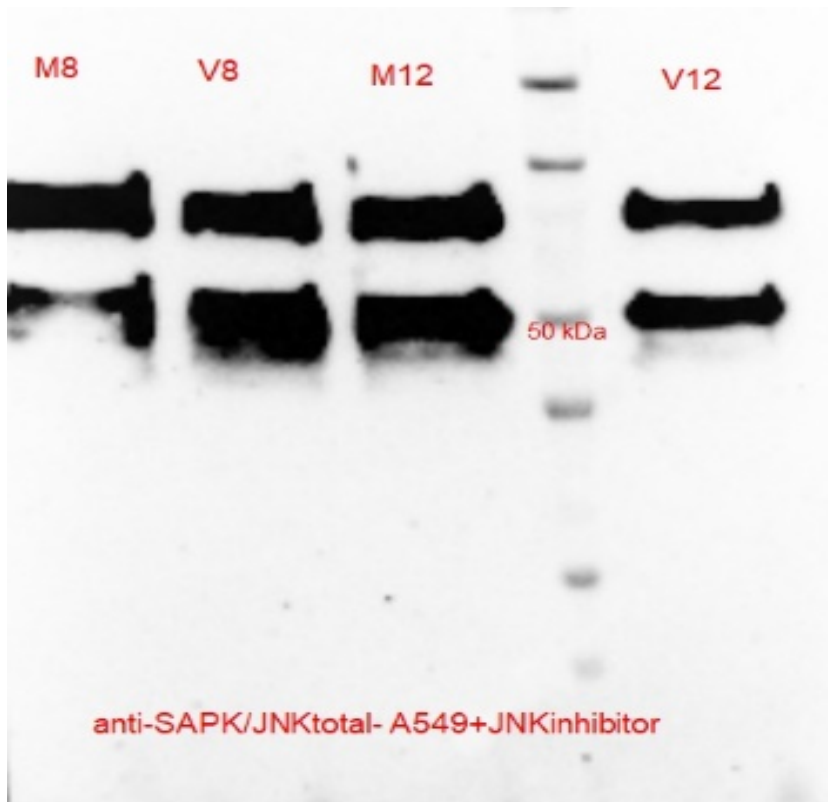

Fig.4D-WB: JNKtotal-A549+JNKinhibitor

**Western Blots for Figure 5**

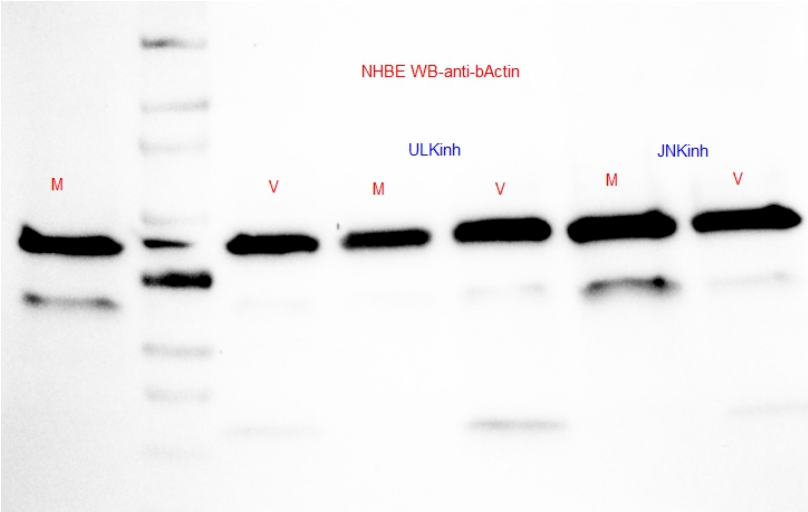

**Fig.5A b-actin in NHBE**

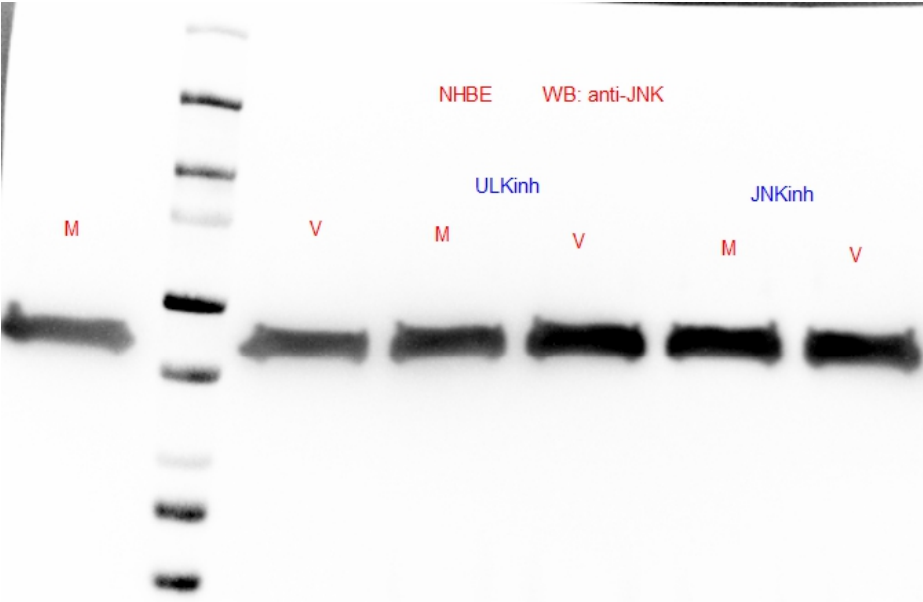

**Fig.5A total JNK in NHBE**

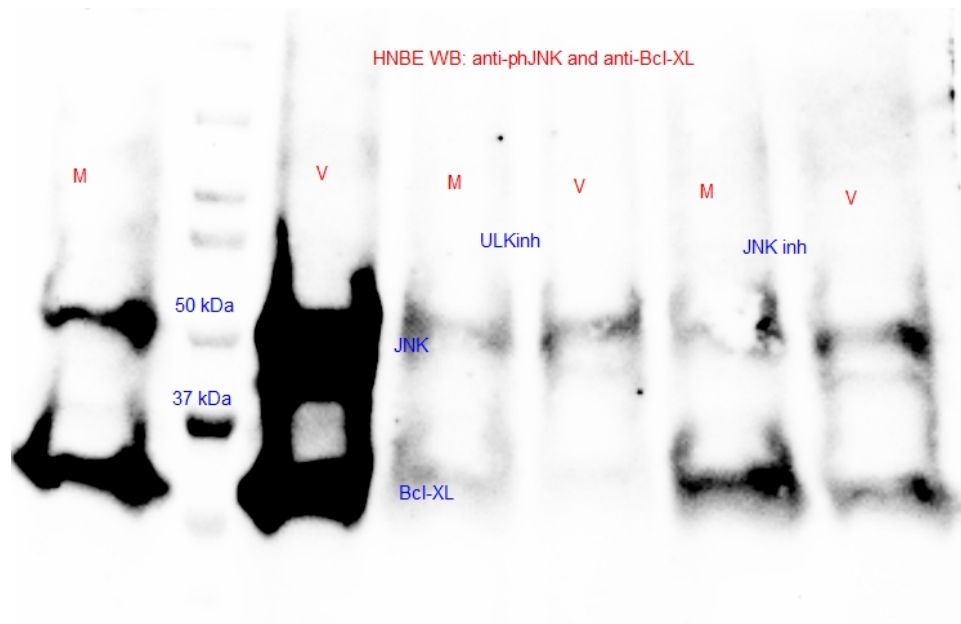

**Fig.5A phosphoJNK in NHBE (together with Bcl-XL)**

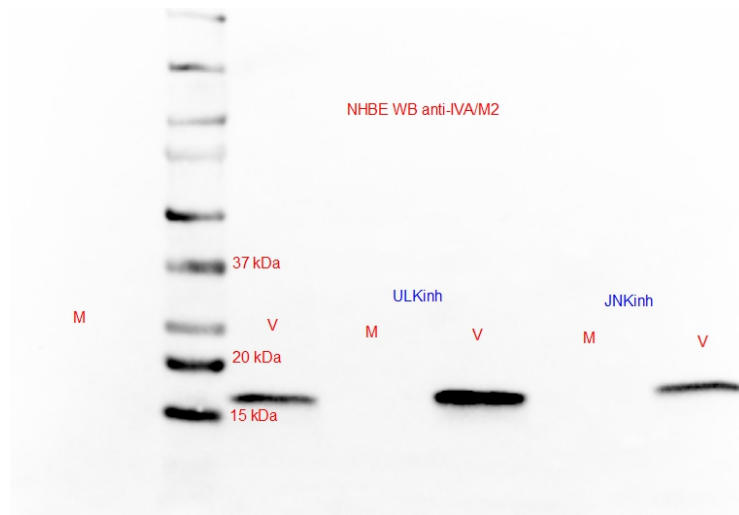

**Fig.5A IVA/M2 in NHBE**

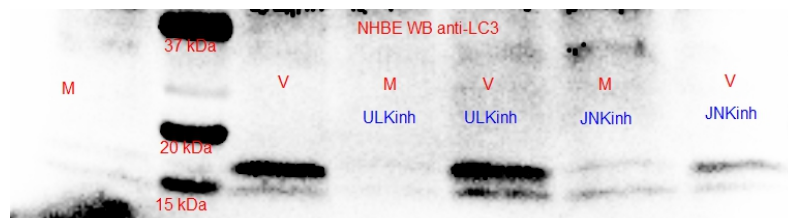

**Fig.5A LC3B in NHBE**

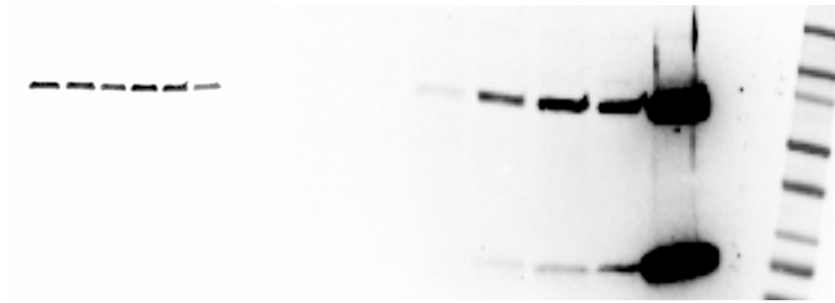

Figure S3A:

Anti-B-actin

anti-IVA-PCh-NP&M2 at MOI 5

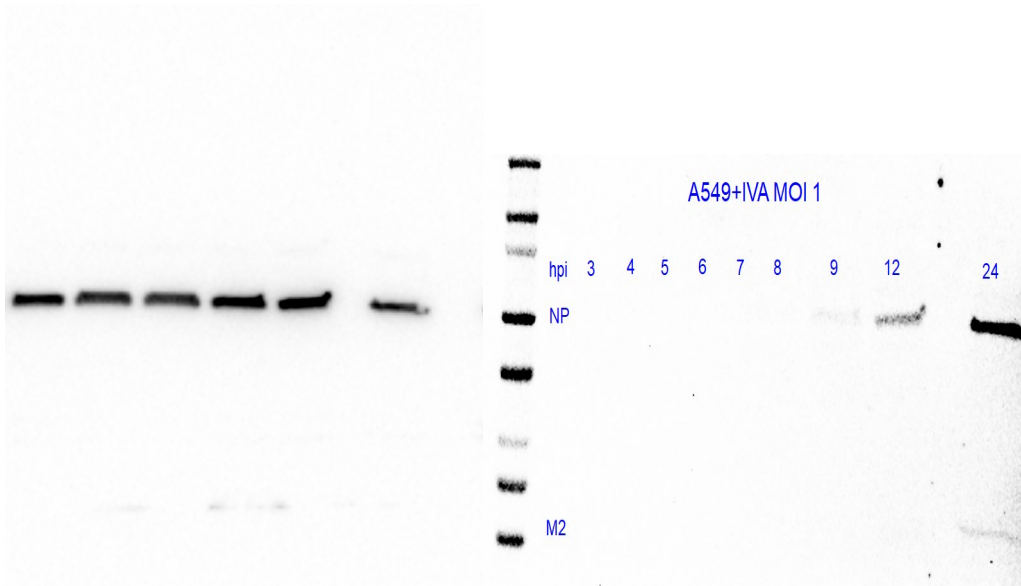

Figure S3A

Anti-B-actin

anti-IVA-PCh-NP&M2 at MOI 1

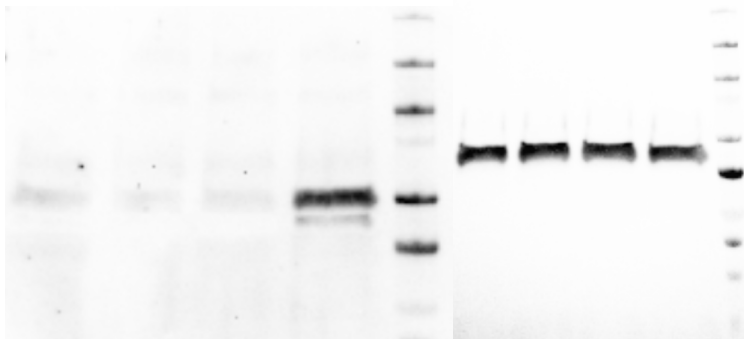

Fig S3C

Anti-ph-JNK

anti-B-actin
