# Supplementary material for: Nonclassical autophagy activation pathways are essential for production of infectious Influenza A virus in vitro
Source: PubMed Central journal article supplement — Mol Microbiol. 2022 Jan 6;117(2):508–24. doi: 10.1111/mmi.14865 (PMC9305535; doi:10.1111/mmi.14865), 2022-01-06
Supplement: MMI-117-508-s003.pdf [file MMI-117-508-s003.pdf]

## 25 **Take Aways**

- 26 • Inhibition of ULK1 function does not change the course of autophagy activation in non-  
27 starved, Influenza A infected lung epithelial cells.
- 28 • IAV replication simultaneously activated transcription of key genes regulating mTORC1  
29 and autophagy in human lung epithelial cells.
- 30 • Influenza A virus co-opts host stress response mechanisms regulated by the c-jun N-  
31 terminal kinase to boost production of infectious virus particles.

32

## 33 **1. INTRODUCTION**

34 Autophagy is a pro-survival mechanism supporting eukaryotic cell adaptation to various  
35 environmental stressors, such as nutrient starvation, UV irradiation, and microbial infections [1-  
36 5]. The current concepts in cellular biology attribute plurality of functions to autophagy, including  
37 sustenance of healthy cellular physiology and energy homeostasis; regulation of inflammation;  
38 and support of innate and adaptive immunity through pathogen clearance and antigen presentation  
39 [6-14]. While the cell signaling pathways regulating autophagy initiation are stress factor specific,  
40 the core mechanism of autophagosome biogenesis invariably leads to the formation of double-  
41 membraned vesicles that randomly or selectively engulf cytoplasmic cargo. For the degradation of  
42 the captured cargo, autophagosomes fuse with lysosomes forming autolysosomes where low pH  
43 and abundance of proteolytic enzymes aid the recycling of damaged organelles into anabolic  
44 building blocks and energy source molecules. Additionally, microbes engulfed by the eukaryotic  
45 cells via endocytosis are targeted to the autolysosomes for degradation [15, 16].

46 The role of autophagy as an intrinsic mechanism of eukaryotic cell resistance to pathogens  
47 has sparked interest in host-directed therapeutics development [7, 17]. Due to the great diversity

48 of DNA and RNA virus replication mechanisms, development of broad-spectrum antiviral  
49 therapeutics remains an impossible task. To address this problem, anti-viral treatment protocols  
50 based on augmentation of host cell antimicrobial mechanisms, such as autophagy, can be  
51 implemented [18-20]. Paradoxically, a growing list of viruses and intracellular bacteria take  
52 advantage of host autophagic machinery to promote their own replication [10, 21-23]. To further  
53 complicate the issue, in discrete cases autophagy activation has both pro- and anti-viral function  
54 [18, 24]. Therefore, identification of pharmacological targets for broad-spectrum antiviral  
55 therapeutics demands in depth understanding of the autophagic machinery components that  
56 enhance host defenses and those co-opted for virus replication.

57 Influenza A virus (IAV) is an enveloped respiratory pathogen causing seasonal infections with  
58 morbidity and mortality among human and animal populations. Historically, influenza viruses  
59 have been responsible for several devastating global pandemics [25, 26]. Periodic cycling of  
60 influenza subtypes and strains requires the design of seasonal vaccines that often miss unexpected  
61 rearrangements of viral antigens [27]. IAVs evolve resistance to antiviral drugs and genomic re-  
62 assortment events further accelerate the global dissemination of resistant viruses [28, 29].

63 When traditional anti-viral treatments fail, therapeutics against host regulatory proteins may  
64 come to the rescue. It has been previously shown that chemical inhibition of autophagy improved  
65 the survival rate of the H5N1-infected host by reducing inflammation and severe lung damage  
66 [30]. Notwithstanding the evidence, the relationship between IAV and autophagy is quite  
67 complicated. The autophagy machinery was found to facilitate influenza virus replication, while  
68 at the same time most IAV strains hijack host translational machinery by activating the mechanistic  
69 target of rapamycin (mTOR) complex 1 to ensure viral protein synthesis [31-33]. The IAV  
70 dependence on both mTORC1 and autophagy is seemingly paradoxical because activation of

71 mTORC1 through phosphoinositide 3-kinase (PI3K) and AKT signaling results in mTORC1-  
72 directed phosphorylation and inhibition of autophagy activation kinase 1 (ULK1) complex [34-  
73 37].

74 The IAV causing seasonal epidemics in humans (strains H1N1 and H3N2) utilize their non-  
75 structural protein 1 (NS1) as an anti-apoptotic agent via direct interaction with the p85 $\beta$  subunit of  
76 PI3K and activation of AKT1 signaling pathway [41-43]. Thus, the viral NS1 stimulates mTORC1  
77 kinase function to facilitate protein synthesis and cap-dependent translation initiation through  
78 cascade of phosphorylation events, including p70 S6 kinase and 4E-BP1 [31, 38]. Activated  
79 mTORC1 is supposed to inhibit autophagy through ULK1 signaling, however it supports the  
80 synthesis of viral proteins acting as autophagy stimulation factors, including hemagglutinin (HA)  
81 and ion channel matrix 2 (M2) [33]. Specifically, the influenza virus M2 protein interaction with  
82 the Microtubule-associated protein light chain 3 (LC3), a core structural protein of the  
83 autophagosomes, was found to inhibit autolysosome formation while redirecting the LC3-M2  
84 complex to the plasma membranes [33, 44]. This process is associated with delays in apoptosis  
85 initiation and facilitation of virion assembly and budding [44, 45].

86 Current models describe autophagy as a host response mechanism activated during the late  
87 stage of IAV replication [45], while mTORC1 and mTORC2 activation by IAV infection was  
88 reported to occur midway through the IAV replication cycle [31]. These models, based on Western  
89 blot (WB) phosphoproteomic data analysis, are influenced by two main experimental  
90 shortcomings: sensitivity limitations of WB and use of cancer cells as host models for *in vitro* IAV  
91 infection studies. Here, we sought to elucidate the autophagy-regulating component that is  
92 essential for IAV replication in lung epithelial cells. We applied a highly sensitive analytical  
93 approach and validated our findings in a non-cancer cell model. We performed a RNA-sequencing

94 based meta-transcriptomic study of IAV and host gene activation dynamics throughout the virus  
95 replication cycle at two multiplicities of infection (MOI), 1 and 5. We found that viral load has a  
96 strong influence on the mode and dynamics of host cell protective responses and autophagy  
97 activation. With a protocol that does not induce autophagy due to serum starvation of the host cells  
98 during the virus absorption stage, we detected simultaneous activation of mTOR complex 1 genes  
99 and key autophagy regulating genes early upon virus infection (1-3 hpi at MOI 1). Subsequent  
100 phosphoproteomic analysis verified that the classical autophagy activation pathway through ULK1  
101 signaling did not play a significant role in the autophagy activation upon IAV infection, while the  
102 activation of c-jun N-terminal kinase (JNK) was essential for viral protein accumulation. JNK, a  
103 stress-activated protein kinase (SAPK) activated by various viruses [46-48], is stimulated by direct  
104 interaction with the IAV NS1 protein [49]. We show that chemical inhibition of JNK abrogated  
105 viral protein accumulation in lung carcinoma A549 cells and significantly inhibited infectious viral  
106 titer in non-cancer cells. Host-directed antiviral therapy targeting key regulators of non-classical  
107 autophagy pathways, such as JNK/SAP, could show less toxicity *in vivo* compared to a  
108 pharmacological inhibition of the classical autophagy pathways that are essential for proper host  
109 immune defenses.

## 110 **2. RESULTS**

### 111 *2.1. Serum depletion activates autophagy prior to Influenza A virus replication in vitro*

112 Cleavage of IAV hemagglutinin (HA) is required for fusion of the viral capsid with host-cell  
113 endosomal membranes. Proteases secreted by the respiratory epithelium are responsible for HA  
114 cleavage *in vivo* IAV infection [58-60]. The majority of *in vitro* cell models (MDCK, HEK293, or  
115 A549) utilized to study the role of autophagy in IAV replication do not produce proteases that

116 cleave HA necessitating the addition of trypsin to promote virus infectivity. Typically, during the  
117 one-hour virus absorption stage, the host cells are incubated in serum free media containing the  
118 infectious virus and TPCK-trypsin [31, 33, 44, 45, 61]. Applying time-lapse microscopy, we  
119 monitored the cellular localization of transcription factor EB (TFEB) in live cells, as a biomarker  
120 of autophagy activation [62], and registered TFEB translocation into the nucleus of mock-treated  
121 A549 cells within 40 minutes of incubation in serum and virus free media (S1-A). Consistent with  
122 TFEB nuclear localization, we observed a significant drop in the levels of phosphorylated  
123 ribosomal protein S6 kinase  $\beta$ -1 (p70S6K1) indicating inhibition of mTORC1 activity (S1-B).  
124 Thus, serum deprivation protocols for *in vitro* infection of cancer cell lines with IAV generate data  
125 that is biased to a condition where mTORC1 function is downregulated and autophagy is induced  
126 prior to the initiation of viral replication. To investigate the role of IAV infection on autophagy  
127 activation, we adapted a protocol that did not include a serum starvation step. With this protocol,  
128 we were able to study the normal course of autophagy activation upon IAV infection (S1-C) and  
129 found that H3N2 strain, *A/Port Chalmers/1/73*, showed higher tropism to A549 cells compared to  
130 the H1N1 strain, *A/PR/8/1934* (S1-D). Therefore, in this study we used the H3N2 strain to  
131 investigate the role of autophagy in IAV replication in lung epithelial cells.

## 132 2.2. Autophagy activation correlates with Influenza virus A load

133 Employing strand-specific RNA-sequencing (RNA-seq) of infected A549 cells, we  
134 simultaneously measured the kinetics of *A/PCh/1/73* replication and the expression of host genes  
135 affected by IAV replication at 1, 3, 4, 6, 8, and 12 hours post infection (hpi). In order to measure  
136 virus replication, we generated RNA-based growth curves by normalizing the total virus reads to  
137 the total host read coverage (Fig.1A). The viral RNA accumulation profile was consistent with the  
138 virus titration growth curves (S1-D). To reproducibly detect reads from genes with low

139 transcription rates, we performed infections with moderate (1) and high (5) multiplicities of  
140 infection (MOI) representing the ratios of host cells to infectious virus particles. At MOI5, we  
141 observed a rapid increase in the viral transcript levels that accounted for 10% of the total RNA  
142 reads within 2 hours of infection and plateaued between 4 and 8 hpi, accounting for 75% of the  
143 total RNA reads (Fig.1A). In contrast, we observed exponential viral growth within 4 hours of  
144 infection at MOI1. By 12 hpi, viral RNA levels started to decline in both infection conditions.

145 The objective of our study was to evaluate the effect of IAV replication on the expression  
146 profiles of genes involved in the regulation of autophagy, mTOR signaling pathways, and innate  
147 immunity. We observed greater dynamics in global host transcriptome (with DGE  $\geq$  2-fold change)  
148 during early stages of IAV infection compared to later timepoints of virus replication when data  
149 was normalized to time-matched mock-treated cells (Fig.1-2). Virus load played a significant role  
150 in the gene expression dynamics.

151 At a moderate virus load (MOI1), within 4 hours of infection, we observed a sequential  
152 activation of genes that regulate the early stages of the autophagy pathway (Fig.1B). We witnessed  
153 initiation of autophagy elongation phase by the activation of ULK2 and Autophagy and Beclin-1  
154 Regulator protein (AMBRA1) (1 hpi) followed by ATG13 and RUBCN (3 hpi) transcript  
155 accumulation. Activation of ATG7 and ATG10 gene expression corresponds to the elongation of  
156 nascent autophagosomal membrane at 1 hpi. ATG4A, a regulator of the final stage of functional  
157 autophagosome formation (phagophore membrane fusion), was differentially upregulated at 6 hpi,  
158 while the MAPK1LC3 gene activity, facilitating the phagophore membrane fusion, remained  
159 unchanged up to 12 hpi.

160 During the period of exponential virus replication (1 to 4 hpi), we observed a gradual  
161 accumulation of the AMBRA1 transcripts encoding for a core subunit of the PI3K complex that is

162 essential for the initiation and maturation of autophagosomes. AMBRA1 gene expression declined  
163 at later stages of infection (6-12 hpi) when the viral load surpassed 50% of total RNA reads,  
164 overwhelming the host transcription machinery.

165 The gene activation dynamics of autophagy regulators showed oscillatory pattern at high virus  
166 load (MOI5). Compared to DGE in cells infected with lower MOI, at MOI 5 gene expression of  
167 AMBRA1, ULK2, ATG10, and ATG16L, spiked 3 hpi instead of 1 hpi. We could not detect  
168 ATG13 activation in the samples infected with IAV at MOI5, while this key regulator of the  
169 autophagy initiation was differentially activated for five hours (3-8 hpi) in A549 cells infected at  
170 MOI1. It is possible that DGE dynamics could have been accelerated at high virus load (MOI5),  
171 and therefore, we were only able to detect the “tail” of the gene activation burst at 1 hpi for genes  
172 regulating the early stages of autophagosome formation: ATG5, ATG16L1, ATG3 (Fig. 1B). The  
173 observed delay of ATG10 activation at MOI5 (3-4 hpi) compared to infection at MOI1 (1-3 hpi)  
174 may be indicative of a secondary oscillatory burst in the activation of autophagy gene regulators  
175 due to increased virus burden.

176 A steady accumulation of BAD gene transcripts was characteristic of the A549 cells infected  
177 at MOI5 (Fig.1B). BAD protein positively regulates apoptosis by forming dimers with cell death-  
178 reversing BCL-2 protein. Consequently, the transcript levels of BCL2L1 were upregulated within  
179 1 hour of infection at MOI5. Another DGE profile specific to lung carcinoma cells infected with  
180 high IAV load was the upregulation of RPS6KB2, a mTOR substrate responsible for stimulation  
181 of protein synthesis through phosphorylation of S6 ribosomal protein and eukaryotic translation  
182 initiation factor 4B (eIF4B). In contrast, RPS6KB2 was not differentially expressed in A549 cells  
183 infected at MOI1, while the transcript levels of global protein synthesis inhibitor, EIF2AK3,  
184 increased between 4 and 6 hpi. The cause for EIF2AK3 gene activation could be energy depletion



185 in the lung cells hosting rapidly replicating virus. Interestingly, EIF2AK3 gene transcription  
186 exceeded background levels within the first 3 hours of infection at a high viral load. These data  
187 suggest that host cells attempted to counteract viral replication by shutting down protein synthesis,  
188 while virus co-opted host cell protein synthesis machinery for replication (Fig.1B).

189 MAPK3/ERK controls various biological functions, including cell growth, survival, and  
190 differentiation. Depending on interaction with a pathway-specific substrate, MAPK3 can activate  
191 translation through EIF4EBP1 and apoptosis through phosphorylation of BAD. Additionally,  
192 MAPK3 activates mTORC1 by phosphorylation of RAPTOR and TSC complex [63, 64].  
193 Activated mTORC1 positively regulates protein synthesis and inhibits activation of autophagy  
194 pathway through ULK1/2 complex. Surprisingly, MAPK3 and autophagy regulating genes were  
195 simultaneously activated during the exponential phase of IAV replication (Fig.1B, MOI1). At  
196 higher MOI (5), MAPK3 gene expression spiked at 3 hpi and returned to base levels thereafter.  
197 These results suggest that cell stress induced by the high burden of viral protein synthesis could  
198 initiate negative feedback mechanisms to activate MAP3K transcription.

199 Collectively, our unbiased transcriptome study of lung cancer cells infected with IAV  
200 demonstrated that the autophagy pathway was activated during the exponential stage of virus  
201 replication. High virus load (MOI5) stimulated both pro-apoptotic gene groups (BAD and  
202 BCL2L1) and genes essential for enhanced protein synthesis (RPS6KB2) within an hour of  
203 infection. At MOI1, genes regulating initiation of autophagy were activated during the exponential  
204 phase of IAV replication. Autophagy gene expression showed oscillatory behavior both at high  
205 (MOI5) and low (MOI1) virus load.

206 *2.3. IAV replication simultaneously activated genes regulating mTORC1 and ULK1 pathways*

207 mTOR regulatory complex is activated at nutrient rich environment to positively regulate  
208 protein synthesis, cell growth and differentiation. A common set of protein kinase regulatory  
209 proteins associate with the proteins Raptor and Rictor to form two complexes: mTORC1 and  
210 mTORC2 respectively, each complex carrying a distinct function. Activation of mTOR1 facilitates  
211 protein synthesis through phosphorylation of ribosomal protein kinase S6K (RPS6K), while  
212 mTORC2 regulates cytoskeleton dynamics and cell survival [35, 36]. To promote cell survival,  
213 mTORC2 phosphorylates and activates SGK1 and AKT kinases. Growth factors activate  
214 mTORC1 through the phosphoinositide-3 kinase (PI3K)-AKT or SOS-MAPK3/ERK signaling  
215 axis [65, 66]. Additionally, the LRP-GSK axis neutralizes the inhibitory action of the TSC1/2  
216 complex and positively regulates mTORC1 activity [67].

217 Previous studies have shown that H1N1 IAV ramps up the production of viral proteins through  
218 direct activation of PI3K [31, 33]. Here, we observed transcription activation of PI3K catalytic  
219 subunit alpha (PI3KCA) within an hour of H3N2 IAV infection at MOI1. Thereafter, PI3KCA  
220 transcript levels gradually decreased during the exponential accumulation of viral RNA to spike  
221 again at 12 hpi (Fig.2A, MOI1). In contrast, we detected no activation of PI3KCA gene expression  
222 upon infection with high MOI. (Fig.2A, MOI5) Similarly, gene transcription of Raptor (RPTOR)  
223 and its activator AKT1 was stimulated early upon IAV infection at MOI1 and was inhibited at  
224 later stage of the virus replication cycle (Fig.2, MOI1). Both genes were slightly activated within  
225 an hour of IAV infection at high virus load (Fig.1A and 2, MOI5).

226 Interestingly, the AKT isoforms were activated upon IAV infection in a sequential order:  
227 AKT1 at 3-4 hpi, AKT2 at 4-8 hpi with maximum expression levels at 6 hpi, and AKT3 at 3-8 hpi  
228 (Fig.2, MOI1). At high virus load, the AKT3 levels peaked at 6 hpi (Fig.2, MOI5). AKT kinases  
229 regulate many processes including cell metabolism and survival via mTOR dependent and

230 independent signaling pathways. The timing of AKT1/2/3 isoform, RPTOR, and RICTOR gene  
231 activation suggested that AKT1 and AKT2 regulate protein synthesis through mTORC1 signaling,  
232 while AKT3 gene function can be linked to cell survival through mTORC2 activation. Exponential  
233 IAV growth coincided with activation of RICTOR gene transcription (Fig.1A and Fig.2, MOI1).  
234 RICTOR gene activation followed oscillatory pattern similar to DGE of the major autophagy  
235 regulators both at lower and high virus load. In comparison, SOS1 and SGK1 genes regulating cell  
236 survival and stress responses were upregulated only at the early stages of virus replication (Fig.2).

237 The ULK1 gene was upregulated upon IAV infection at MOI 1 and sustained transcription  
238 activity until the later stage of viral replication (12 hpi). In contrast, at high virus infection load  
239 (MOI5) we observed a less pronounced ULK1 upregulation at 3 hpi followed by gene inhibition  
240 at later stages of virus replication (Fig.2, MOI5). Notably, ULK2 gene transcription was inhibited  
241 in host cells infected with the lower viral load (MOI1). In contrast, ULK2 gene was activated at  
242 the early stage (3 hpi) of IAV infection at MOI5. The ULK2 expression profile was consistent with  
243 that of AMPK subunit alpha (PRKAA1) and showed inverse DGE pattern to the ULK1 gene  
244 expression (Fig.2). In summary, our transcriptome data indicate that upon IAV infection at MOI1  
245 nutrient depletion may not contribute to the stimulation of the autophagy pathway.

246 Collectively, we observed steady accumulation of ULK1, MAPK3/ERK (Fig.1B, MOI1) and  
247 LRP6 (Fig.2, MOI1) gene transcripts throughout the virus replication cycle indicating that genes  
248 regulating autophagy and mTORC1 activation were simultaneously activated. The oscillatory  
249 pattern of key autophagy (ATG7, Fig.1B, MOI1) and mTORC2 (RICTOR, Fig2, MOI1) gene  
250 expression profiles suggests that viral replication activates two major cell survival pathways:  
251 autophagy and mTORC2.

252 *2.4. IAV replication activates autophagy in lung epithelium cells independently of the ULK1*  
253 *signaling pathway*

254 Our global transcriptome analysis revealed previously uncharacterized correlation between  
255 IAV load and activation of ULK gene transcription. While ULK1 gene was consistently  
256 transcribed in A549 cells throughout the IAV virus replication cycle at MOI1, its expression  
257 dynamics remained mostly unchanged at MOI5 (Fig.2, S2). Therefore, we further investigated on  
258 a post-transcriptional level the role ULK1 plays in autophagy activation and IAV replication.

259 Applying Western blot (WB) analysis, we could barely detect viral protein accumulation 12  
260 hpi at MOI1 (S3), while the transcriptome analysis showed that viral RNA had reached maximum  
261 levels at 4 h post-infection (Fig.1A). We could detect accumulation of viral proteins (M2 and NP)  
262 with WB as early as 6 hpi at MOI5 (Fig.3A). At this high virus load, total IAV transcript levels  
263 reached their maximum levels between 3 and 4 hpi and declined at 6 hpi (Fig.1). The observed  
264 time gap between transcript and protein accumulation is largely due to the substantial difference  
265 in target detection sensitivity between the two analytical methods. Quantitative analysis of  
266 percentage infected cells via flow cytometry indicated that at MOI1 close to 10% of the total cell  
267 population harbored the virus, while at MOI5 half of the population become infected (S3). Since  
268 both methods analyze bulk transcript or protein levels, the WB data could only reveal the  
269 biomarkers with the most prominent changes elicited by IAV infection.

270 Regardless of WB sensitivity limitations, we could observe activation of autophagy through  
271 accumulation of lipidated LC3B-II form of the microtubule-associated protein light chain protein  
272 that coincided with IAV protein accumulation (Fig.1A) [16]. When autophagy is activated via the  
273 classical pathway, the levels of ULK1 phosphorylation at Ser757 subside due to inhibition of  
274 mTORC1 activity [2]. Since the global transcriptome analysis showed continuous activation of

275 ULK1 gene expression at MOI1 and no significant changes in gene activity at MOI5, we further  
276 investigated the role of ULK1 in infected cells enduring metabolic stress due to high virus protein  
277 levels at MOI5. Inhibition of ULK1 phosphorylation at S757 with small molecule SBI0206965  
278 did not change the course of autophagy activation upon IAV infection as we observed continuous  
279 accumulation of lipidated LC3-II form in virus-infected cells (Fig.3A-B). At the same time, we  
280 observed no reduction of viral protein levels in A549 cells treated with the ULK1 inhibitor  
281 (Fig.3A).

282 We further validated our WB results by applying immunocytofluorescence with anti-LC3B  
283 antibodies. We observed autophagosome vesicle formations in IAV-infected A549 cells when  
284 ULK1 signaling was inhibited with a small molecule (S4 and Fig.3C) thus confirming the WB-  
285 based proteome data. Collectively our data indicated that autophagy was activated through an  
286 alternative to ULK1 signaling pathway during IAV infection.

### 287 *2.5. IAV infection upregulates AKT and Stress Response Kinase JNK activity in A549 cells* 288 *midway through the virus replication cycle*

289 Previous *in vitro* studies of IAV infection have demonstrated that viral proteins stimulate  
290 mTORC1 activity to ensure virus protein expression and promote successful replication [33, 41].  
291 Additionally, mTORC2 function supports host survival in the later stages of IAV replication when  
292 cells undergo significant stress [31].

293 To validate our findings from the global transcriptome analysis of mTOR-regulatory complex  
294 differential gene expression, we measured mTORC1 and mTORC2 activity in IAV infected A549  
295 cells. We observed that at MOI1 the phosphorylation levels of p70 S6 kinase 1 (S6K), a mTORC1  
296 substrate, remained unchanged, while AKT1- Ser473 phosphorylation, a mTORC2 substrate,  
297 increased throughout the virus replication cycle (Fig.4A). Notably, the exponential increase in

298 phosphorylated AKT-Ser473, an indicator of cell stress, coincided with the accumulation of viral  
299 transcripts (Fig.1A). Our results also demonstrated that the Thre389 phosphorylation on the S6K  
300 increased proportionally to the virus load at the later stage of virus replication (Fig. 4B).

301 The phosphoproteomic data presented here demonstrated that pro-survival mechanisms  
302 dependent on AKT-Ser473 phosphorylation were activated at mid throughout the late stage of the  
303 virus replication cycle, while mTORC1 activity was not affected in cells infected with IAV at  
304 MOI1. We detected mTORC1 activation in the later stages of IAV replication specifically at very  
305 high MOI, when mTORC1 function was required to satiate the high demand for protein synthesis  
306 (Fig. 4B: 9 hpi vs 6 hpi).

307 Together with the activation of AKT anti-apoptotic signaling, we investigated the JNK stress-  
308 response regulator upon virus infection. JNK activation is a common response to many stress  
309 stimuli, including endoplasmic reticulum (ER) excessive stress, causing apoptotic cell death  
310 through regulation of the BCL2 family proteins [68-70]. Our Western blot results showed  
311 consistent accumulation of Thr183-phosphorylated JNK in IAV infected cells. This was  
312 proportional to the synthesis of viral proteins (Fig.4C). Activation of JNK signaling occurred  
313 midway through the IAV (H3N2) replication cycle and coincided with the AKT-pSer473 anti-  
314 apoptotic signaling (Fig.4A and C). For comparison, we detected accumulation of phosphorylated  
315 JNK-Thr185 at later time upon infection with similar MOI of IAV (H1N1) subtype (S3C). These  
316 findings underline strong correlation between the accumulation of high virus protein amount and  
317 stress-activated JNK signaling. Importantly, pharmacological inhibition of JNK signaling through  
318 Thr183 phosphorylation resulted in a significant decrease in IAV protein synthesis and a weaker  
319 autophagy pathway stimulation, measured as reduced levels of the lipidated LC3B-II (Fig.4D). We  
320 observed that the LC3-II/LC3-I ratio increased 8-fold within 12h of virus infection compared to

321 the time matched mock-treated A549 cells with functional JNK signaling and only 2-fold in the  
322 IAV infected cells exposed to JNK inhibitor (Fig.4D).

323 Taken together, the phosphoproteomic analysis of AKT-Ser473 and JNK-Thr187 signaling  
324 upon infection of A549 cells with IAV indicate that viral proteins stimulated host anti-apoptotic  
325 adaptations through activation of AKT and JNK stress response mechanisms. Pharmacological  
326 inhibition of JNK signaling dramatically reduced viral protein synthesis in IAV-infected lung  
327 carcinoma A549 cells.

#### 328 *2.6. Pharmacological inhibition of JNK-Thr187 signaling decreased IAV titer in normal human* 329 *bronchial epithelial cells (NHBE) in vitro*

330 Since the cancer cells, including the A549 line, used as models to study IAV replication may  
331 regulate stress response and survival mechanisms differently compared to normal human lung  
332 cells, we further investigated the role of JNK signaling in normal human bronchial epithelial  
333 (NHBE) cells *in vitro* infected with the H3N2 A/PCh/1/73 strain.

334 Western blot analysis of total protein extracted from mock-treated and IAV-infected NHBE  
335 cells showed different responses to ULK1 and JNK signaling inhibition compared to the A549  
336 cancer cell line. The NHBEC were more sensitive to the small molecule compounds SBI0206965  
337 and SP600125 targeting ULK1 and JNK signaling, respectively, therefore we applied lower drug  
338 concentrations. Unexpectedly, ULK1 inhibition caused a decline of JNK-T183 phosphorylation in  
339 IAV-infected NHBEC, although the viral protein (M2) accumulation and activation of LC3B  
340 synthesis remained unaffected (Fig.5A). In contrast to the A549 cancer cells, we detected LC3B  
341 accumulation only in IAV infected NHBEC, either untreated or treated with SBI0206965 to inhibit  
342 ULK1 signaling. LC3B in NHBEC treated with the JNK inhibitor SP600125 was barely detectable  
343 even in IAV-infected populations (Fig.5A). Immunofluorescence analysis, a more sensitive

344 protein detection method, showed that IAV-infected NHBEC produced LC3B. Furthermore, the  
345 percentage of NHBEC harboring IAV protein dropped significantly upon pharmacological  
346 inhibition of JNK signaling (Fig.5B) indicating at its significance for the IAV (H3N2) replication.

347 We further validated the role of JNK and ULK1 signaling in IAV replication analyzing the  
348 infectious virus titers generated by NHBE, adenovirus transformed NHBE (BEAS-2B), and lung  
349 epithelium carcinoma cell line (A549). We found that NHBE from three genetically unrelated  
350 healthy donors produced infectious virus titers comparable to those released by the immortalized  
351 cell lines. Pharmacological inhibition of JNK function reduced the levels of infectious IAV  
352 particles by two-fold in the transformed cell lines and by 20-fold in the NHBE cells (Fig.5C).  
353 These results complemented our Western blot and immunocytochemistry studies and  
354 demonstrated that JNK-signaling inhibition in NHBEC has stronger effect on IAV replication  
355 compared to cell models based on immortalized cell lines.

356 Collectively, our data indicated that IAV (H3N2) activates autophagy independently of the  
357 classical ULK1 signaling pathway in normal and cancer (A549) lung epithelial cells. Although,  
358 IAV infection universally activated JNK signaling in all tested cell models, the immortalized cell  
359 lines were less dependent on this regulatory response for production of infectious virus compared  
360 to NHBEC. The JNK-Thr187 signaling appeared as a stress regulatory mechanism activated by  
361 the rampant synthesis of viral proteins. Therefore, inhibition of JNK-Thr187 signaling decreased  
362 the host cell capacity as a virus “factory” and resulted in a significant reduction of infectious IAV  
363 titer *in vitro*.

364 *2.7. IAV matrix protein M2 interaction with the host LC3B protein activates autophagosome*  
365 *formation*



366 Our Western blot results have consistently indicated that IAV infection activates autophagy  
367 in strict correlation to accumulation of viral proteins (Fig.3A, 4D, and 5A). Since detection of the  
368 lipidated LC3B-II form was contingent to high viral protein load, we designed experiments to test  
369 whether direct interaction between the viral M2 protein and the autophagosome core protein occurs  
370 *in situ* and activates autophagy independently of the classical (ULK1) or alternative (JNK)  
371 signaling cascades. Previous studies have inferred interaction between the two proteins from *in*  
372 *vitro* binding studies and infections with M2-deficient H1N1 virus [44]. Here, we utilized split  
373 green fluorescent protein (GFP) methodology [55] to directly test M2-LC3 interaction in live cells.  
374 We tagged each LC3B and M2 proteins with GFP fragments 10 (G10) and 11 (G11). Plasmids  
375 expressing proteins tagged with the GFP fragments were co-transfected in HEK293T cells. No  
376 fluorescence was detected in transfected cells prior to addition of the GFP1-9 scaffold domain  
377 (data not shown). Since the GFP1-9 utilized in this study was not optimized to fold properly in  
378 mammalian cells, we supplied purified and folded GFP1-9 peptide *in trans* similar to the antibody  
379 staining techniques. Thus, we registered protein-protein interactions that occurred in live cells in  
380 fixed cells supplemented with the GFP1-9 scaffold.

381 Guided by previous knowledge that M2 forms homo-dimer and tetramer complexes [71], we  
382 co-transfected plasmids expressing M2 protein tagged with G10 and G11 as a positive control for  
383 our assay. As expected, complementation of the split-GFP fragments in HEK293T cells expressing  
384 M2-tagged proteins resulted in fluorescence that highlighted the extracellular membrane and  
385 intracellular membranous structures where M2 resides (Fig.6A, upper left panel). Self-  
386 oligomerization of LC3B protein has not been previously reported, therefore we applied G10 and  
387 G11-tagged at the N-terminus of LC3B-expressing plasmids as a negative control. Unexpectedly,  
388 split-GFP complementation of the LC3B-tagged proteins recovered the GFP fluorescence activity

389 (Fig.6A, upper right panel). The fluorescent signal was consistent with that of native LC3B-I  
390 protein cellular localization (S4). Finally, co-transfection of plasmids expressing tagged LC3B and  
391 M2 proteins produced fluorescently labeled cell membrane and phagosomes consistent with the  
392 localization of LC3B-II and M2 (Fig. 6A, lower panel).

393 We further validated the effect of M2 accumulation on LC3B lipidation required for inclusion  
394 into cellular membranes. Applying Western blot analysis, we compared the levels of lipidated  
395 LC3B-II in HEK293T parental cell line and a derivative cell line with stable chromosomal  
396 integration of M2 gene under Tet-inducible promoter, HEK293-M2 [56]. Activation of M2 gene  
397 expression upon addition of tetracycline resulted in higher M2 protein levels and increased the  
398 accumulation of LC3B-II (Fig.6B). This data is in agreement with our results from A549 infection  
399 experiments with the H3N2 IAV, where we observed inhibition of LC3B-II accumulation in cells  
400 treated with siRNA targeting the viral M2 transcript (Fig.6C). In the same samples, we tested the  
401 effect of M2 depletion on JNK phosphorylation and found no evidence that M2 protein was solely  
402 responsible for the activation of JNK signaling pathway (Fig.6C). On the other hand, chemical  
403 inhibition of JNK phosphorylation resulted in decrease of M2 protein levels while there was no  
404 effect on the LC3B maturation process (Fig.6C).

405 Altogether, data presented here demonstrate direct interaction between the viral M2 protein  
406 and LC3B that occurs on the cell membranes. The split-GFP assay shows that the IAV matrix  
407 protein recruited LC3B to the extracellular membrane and *vice versa*, the M2 protein localized at  
408 the autophagosome membranes where LC3B-II naturally resides. The viral M2 protein stimulated  
409 the LC3B lipidation required for the autophagosome maturation.

### 410 **3. Discussion**

411 Autophagy has been shown to significantly impact the virus life cycle, particularly the  
412 fledgling phase of viral RNA synthesis [61] and presents an appealing target for host-directed  
413 antiviral therapeutics. However, the role of autophagy during viral infection varies by cell type  
414 and viral strain – making the critical investigation of autophagy during IAV infection, of which  
415 there are an estimated 198 subtypes, uniquely challenging. Here, we evaluated the effect of IAV  
416 replication on the expression profiles of genes involved in autophagy regulation and mTOR  
417 signaling. The majority of *in vitro* IAV infection studies are based on cell models in which  
418 autophagy activation predated virus infection. By omitting cell serum starvation during the virus  
419 absorption step, we were able to capture autophagy activation during IAV infection that is more  
420 representative of the events occurring *in vivo*.

421 We observed global host transcriptome changes ( $LFC \geq 2$ ) that varied between the early stages  
422 of IAV replication and later timepoints depending on the ratio between infectious virus and host  
423 cells, indicating that virus load played a significant role in gene expression dynamics (Fig. 1-2).  
424 Despite host cells' efforts to shut down protein synthesis, IAV replication activated mTORC1  
425 signaling, positively regulating protein synthesis in nutrient rich conditions. Both mTORC1 and  
426 mTORC2 carry out distinct functions: activation of mTOR1 facilitates protein synthesis and  
427 inhibits autophagy via repression of ULK1 signaling, while mTORC2 regulates cytoskeleton  
428 dynamics and cell survival [72, 73]. Despite the activation of mTORC1, IAV replication also  
429 simultaneously activated autophagy independent of ULK1 signaling. The ULK1 gene executes a  
430 feedback loop between mTORC1 signaling and the autophagy pathway, inhibiting mTORC1 via  
431 interaction with RPTOR during stress [74-76]. RPTOR gene activation was limited to the early  
432 stages of IAV infection and may not have had the capacity to inhibit ULK1 function, particularly  
433 given the continuous ULK1 transcript accumulation throughout the virus replication cycle (Fig.2

434 and S2). At the same time, RICTOR gene activation occurred throughout the viral replication cycle  
435 playing a major role for mTORC2 signaling in IAV infected cells [76, 77]. Our global  
436 transcriptome analysis of IAV (H3N2) infected cells revealed remarkable dependence of ULK1  
437 and ULK2 gene activation on the viral load. At lower MOI1, the ULK1 gene was continuously  
438 activated throughout the IAV replication cycle. At MOI5, ULK1 gene expression was mostly  
439 suppressed and ULK2 was activated briefly at the early stage of IAV replication. We further  
440 examined the role of ULK1 signaling on post-transcriptional level and found that pharmacological  
441 inhibition of ULK1 had no significant effect on IAV replication and activation of autophagy in the  
442 lung cancer A549 cell line (Fig.3).

443 In response to increased viral burden, we observed secondary oscillatory burst of autophagy  
444 gene regulator activation as infection progressed (3-4 hpi), particularly related to protein synthesis  
445 (EIF2AK3 and MAPK3). However, at a higher viral load (MOI5) MAPK3 gene expression spiked  
446 at 3 hpi and subsequently returned to base levels. This suggests that cell stress burdened by viral  
447 protein synthesis could initiate a feedback mechanism activating MAP3K transcription. These  
448 findings implicate host cell protein synthesis downregulation as a mechanism for impeding viral  
449 replication. In turn, activation of genes regulating mTORC1 activity at early stage of IAV  
450 replication signified viral hijacking of host protein synthesis machinery (Fig.1B and 41-43).  
451 However, the steady accumulation of MAPK3/ERK (Fig.1B, MOI1) and LRP6 (Fig.2, MOI1)  
452 gene transcripts throughout IAV infection indicates that mTORC1 activation could be sustained  
453 on a post-transcriptional level (Fig. 4B: 9 hpi vs 6 hpi).

454 The oscillatory pattern of key autophagy (ATG7, Fig.1B, MOI1) and mTORC2 (RICTOR,  
455 Fig2, MOI1) gene expression profiles demonstrates that viral replication activates two major cell  
456 survival pathways: mTORC1 and autophagy that is independent of ULK1 signaling, also found in

457 Poliovirus infection [78]. This observation and the known relationship between LC3B-II and viral  
458 protein (M2) accumulation leading to autophagosome formation [44, 45], could explain an  
459 autophagy activation alternative to the classical ULK1 signaling pathways. Furthermore, our data  
460 show that pharmacological inhibition of ULK1 function prior to and upon IAV infection did not  
461 change the course of autophagy activation. Together, these results demonstrate that ULK1-  
462 independent simultaneous activation of mTORC1 and autophagy is possible when orchestrated by  
463 IAV proteins boosting their own amplification [31, 41, 43].

464 Previous studies have shown that direct interaction between IAV Matrix 2 (M2) ion-channel  
465 protein with LC3 blocks autophagosome fusion with lysosomes [45] and redirects LC3 to the  
466 plasma membrane to facilitate virus budding [44]. High levels of M2 responsible for accumulation  
467 of LC3II and formation of autophagosomes were linked to retardation of viral growth and  
468 decreased shedding of infectious virus particles [80]. Applying split-GFP technology, we provided  
469 direct evidence for IAV/M2-LC3 protein interaction causing localization of the LC3 to the cell  
470 wall membranes (Fig.6A). This method is superior to the derivation of protein-protein interactions  
471 from colocalization studies of LC3 and M2 fused to full-length fluorescent proteins since the  
472 fluorescent proteins tend to dimerize and produce false-positive puncta formations. We observed  
473 increased formation of autophagosomes in stable cell lines expressing LC3-GFP or LC3-Cherry  
474 fusion proteins and ruled out their application for autophagy activation studies. Thus, our study  
475 concurs with the hypothesis that the viral protein M2 is responsible for the activation of autophagy  
476 independently of the classical or alternative signaling pathway.

477 Additionally, we found that cell survival responses regulated by AKT-Ser473 and JNK-  
478 Thr187 became activated midway throughout the virus replication cycle. Pharmacological  
479 inhibition of JNK signaling dramatically reduced viral protein synthesis in IAV-infected NHBE

480 cells, while there was a modest effect in the cancer cell line A549. Our findings are in agreement  
481 with previous study reporting a key role of JNK signaling in the host cell permissiveness to  
482 Influenza virus replication. Avian IAV subtypes, H5N1 and H9N2, activated JNK signaling in  
483 chicken fibroblasts. In the same host cells, infection with the H1N1 subtype, known as swine flu  
484 causing seasonal epidemics in humans, did not activate JNK phosphorylation [81]. In our studies,  
485 we observed that both H1N1 and H3N2 subtypes activated JNK signaling in human lung cell line  
486 and this correlated with the replication efficiency of the virus (Fig.4-5 and S1D and S3C).  
487 Additionally, we observed unexpected decrease in JNK-Thr187 levels in normal human lung  
488 epithelium cultures infected with IAV (H2N3) when ULK1 signaling was targeted with a selective  
489 inhibitor SBI0206965. This could be the cause of off-target inhibition of kinases regulating JNK  
490 function in this cell type, including FAK [82-84]. Regardless, the IAV replication and production  
491 of infectious virus particles remained unchallenged compared to the experimental group treated  
492 with JNK-specific inhibitor SP600125 (Fig.5) indicating that even at reduced activity JNK  
493 signaling could support IAV infection. Only upon complete inhibition of the JNK function, was  
494 the IAV titer reduced. Collectively, our data indicate that lung carcinoma A549 show reduced  
495 sensitivity to inhibition of JNK signaling during IAV replication compared to NHBEC, supporting  
496 the idea that cell models utilized to study host-pathogen interaction would produce subjective  
497 results. Our study solidified the link between IAV infection and JNK-Thr187 signaling as a stress  
498 regulatory mechanism accompanying the rampant synthesis of viral proteins and activating  
499 alternative autophagy pathways [46-49, 81]. Therefore, therapies that decrease the host cell  
500 capacity as a viral particle “factory” through inhibition of JNK-Thr187 signaling can result in a  
501 significant reduction of infectious IAV titer.

502 In conclusion, our findings indicate that the IAV load is responsible for differential gene  
503 expression dynamics within the cell host. We demonstrate that IAV replication simultaneously  
504 activated transcription of key genes regulating mTORC1 and autophagy in human lung epithelial  
505 cells. Host stress response mechanisms regulated by the c-jun N-terminal kinase are co-opted by  
506 the IAV replication machinery to boost viral titer and their inhibition has the propensity to serve  
507 as host-directed antiviral therapy. We also observed differences between normal human bronchial  
508 epithelial cells and cancer cell lines in their response to virus invasion. In the search of universal,  
509 effective and safe antiviral therapies, we call for comprehensive comparison of data originating  
510 from diverse and relevant cell models of virus infection.

## 511 **4. EXPERIMENTAL PROCEDURES**

### 512 *4.1. Cell culture, media, and chemical reagents*

513 A549 carcinoma human alveolar epithelial cells (ATCC, CCL-185) and Madin-Darby canine  
514 kidney (MDCK) cells (ATCC, CCL-34) were maintained in high-glucose DMEM (Gibco-Thermo  
515 Fisher, Grand Island, NY) and EMEM (Gibco-Thermo Fisher, Grand Island, NY), respectively,  
516 supplemented with 10% (v/v) fetal bovine serum (Gibco-Thermo Fisher, Grand Island, NY).  
517 BEAS-2B (ATCC, CRL-9609), a polyoma virus transformed normal human lung bronchial  
518 epithelial cells, and Normal Human Bronchial Epithelial (NHBE, Lonza-CC2541) were  
519 maintained in Bronchial Epithelial Cell Growth medium obtained from Lonza/Clonetics Co as a  
520 BEGM kit (CC-3170). All cells were cultured at 37 °C and 5% CO<sub>2</sub>.

521 To inhibit ULK1 signaling, A549 cells were cultured in 10%-DMEM media supplemented  
522 with 10 μM SBI0206965 (Selleckchem, Pittsburgh, PA) for 6 hours prior to IAV infection, and  
523 drug concentration was maintained in the media post-virus infection. Since BEAS-2B and NHBE

524 have lower expression levels of ULK1, SBI0206965 was added at 1  $\mu$ M to the BEGM growth  
525 media. We observed high toxicity at 10  $\mu$ M SBI0206965 for both non-carcinoma cell types, which  
526 could be caused by an off-target drug effect at this concentration. To inhibit JNK-Thr187  
527 phosphorylation, we added 10  $\mu$ M SP600125 (Selleckchem, Pittsburgh, PA) to A549 growth  
528 media 6 hours prior to IAV infection, while 5  $\mu$ M and 1  $\mu$ M were added to the culture media of  
529 NHBE and BEAS-2B, respectively, due to sensitivity issues resulting from JNK inhibition.

#### 530 4.2. *Viruses and Virus infection procedures*

531 The following IAV strains were used in this study: *A/PR/8/1934* (H1N1) and *A/Port*  
532 *Chalmers/1/73* (H3N2). The virus work was performed in compliance with CDC guidelines for  
533 biosafety level 2 agents. Virus stocks were prepared from MDCK cells infected at MOI of 0.01 in  
534 the following media: EMEM, 10 mM HEPES (Gibco), 0.125% BSA (Gibco), 1  $\mu$ g/mL TPCK  
535 trypsin (Worthington Biomedical Corporation). MDCK cells were incubated for 1 hour at 37  $^{\circ}$ C  
536 in virus media, washed with PBS, and overlaid with serum free EMEM containing 1  $\mu$ g/mL TPCK  
537 trypsin. Conditioned media was harvested when a cytopathic effect was observed (usually 24 and  
538 48 hpi for *A/PCh/1/73* and, *A/PR/8/34* respectively), centrifuged at 1,000 g for 10 minutes, passed  
539 through 0.45  $\mu$ m Nalgene filter units, and aliquoted in 50% BSA media for storage at -80  $^{\circ}$ C. The  
540 virus titer was determined in MDCK cells by plaque assays, as described previously [50], and  
541 immunoplaque analysis was performed with anti-NP antibody (ThermoFisher, PA5-32242) and  
542 alkaline phosphatase conjugated anti-rabbit antibody.

543 To study the dynamics of viral RNA replication, A549 cells were plated 18 hours prior to  
544 infection in high glucose DMEM supplemented with 5% or 10% Fetal clone III serum at  $1 \times 10^6$   
545 per well in 6-well format dishes. In order to standardize the multiplicity of virus infection (MOI)  
546 between independent virus infection experiments, the cell number was calculated from a control



547 sample immediately before IAV infection. A549 cells were mock treated in 6-well plates with  
548 virus free media or were infected with 250  $\mu$ L virus containing media. To compare the effect of  
549 serum starvation on autophagy activation we utilized two protocols of virus activation for  
550 absorption.

551 The serum-starved protocol has been broadly used in *in vitro* IAV infections and is based on  
552 dilution of viral stocks in serum free media supplemented with 1  $\mu$ g/mL TPCK trypsin followed  
553 by incubation of virus media and host cells for 1 hour at 37°C. After 1 hour, 1 ml of EMEM  
554 supplemented with 5% Fetal clone III serum (5% DMEM) was added and cells were incubated at  
555 37 °C prior to harvest.

556 In the serum replete protocol, 20  $\mu$ g TPCK-treated trypsin (Warthington, Lakewood, NJ) was  
557 added to 1 ml virus stock (harvested from MDCK producer cells in serum free media) and was  
558 incubated for 10 minutes at 37 °C to activate cleavage of viral HA glycoprotein to HA1 and HA2.  
559 Equal volume (1 v/v) of EMEM supplemented with 10% Fetal clone III serum (10% EMEM) was  
560 added to the TPCK trypsin-treated virus to neutralize the enzyme. To determine the titer of  
561 infectious IAV particles, 250  $\mu$ L of the trypsin pre-activated virus diluted to  $2 \times 10^5$  (approximated  
562 from the pfu/ml of the original virus stock) in 10%-EMEM were layered over  $2 \times 10^6$  MDCK cells  
563 in a 6-well plate and incubated for 1h at 37 °C. In parallel, 250  $\mu$ L of the original virus stock diluted  
564 to MOI 0.1 in serum-free EMEM supplemented with 1  $\mu$ g/mL TPCK-treated trypsin was layered  
565 over  $2 \times 10^6$  MDCK cells in a 6-well plate and incubated for 1h at 37 °C. Following the 1h virus  
566 absorption step, 2 mL 10%-EMEM were added to the infected cells and the incubation at 37 °C  
567 continued for 48h. Conditioned media from IAV-infected MDCK cells was serially diluted (log10)  
568 in serum-free EMEM media supplemented with 1  $\mu$ g/mL TPCK-treated trypsin to determine the  
569 virus titer in MDCK cells by plaque assays, as described previously [50]. On average, the titer

570 (pfu/mL) produced by cells infected with trypsin pre-activated IAV in serum replete media was  
571 10-fold lower compared to the infections in serum-free media. To normalize the MOI between the  
572 two protocols, A549 cells were infected at 10-fold higher virus titer for the serum replete protocol  
573 compared to the serum-free protocol. Cells were collected at 1, 3, 6 and 8h post-infection and the  
574 levels of viral RNA were determined via quantitative RT-PCR with Taqman probe (5'-/56-  
575 FAM/AGCTCTCGG/ZEN/ACGAARGGCARCGA/3IABkFQ/-3') and primers (5'-  
576 TCCTCTGCATTGTCTCCGAA-3' and 5'-TGTCYTTYCAGGGGCGGG-3') targeting the IAV  
577 NP6 transcript. With this quantitative method, we observed comparable levels of viral transcripts  
578 ( $\Delta$ Ct normalized to GAPDH transcripts) between the two infection protocols when 10-fold higher  
579 virus titer was applied in the serum-replete protocol. For the transcriptome and WB studies, A549  
580 cells were plated 18 hours prior to infection in 10% DMEM at  $1 \times 10^6$  per well in 6-well format  
581 dishes. Pre-activated virus stock was adjusted to the required MOI in 10% DMEM and was layered  
582 on target cells at 250  $\mu$ L. After 1 hour of incubation at 37 °C, A549 mock and virus infected cells  
583 were topped with fresh 10%-DMEM to a total volume of 2 mL and were incubated at 37 °C prior  
584 to harvest.

#### 585 *4.3. RNA isolation and sample preparation for Illumina RNA Mi-seq analysis.*

586 At indicated time points, post initiation of infection, cells were washed with cold phosphate  
587 buffered saline (PBS) and lysed in the well with 350  $\mu$ L 1% beta-mercaptoethanol supplemented  
588 RLT buffer from the RNeasy Plus Mini kit (QIAGEN, Maryland). Total RNA was isolated  
589 according to the manufacturer's protocol, including on-column removal of gDNA. After elution,  
590 total RNA was treated with Turbo DNA-free Kit (AM1907, Thermo Fisher Scientific) for  
591 complete elimination of gDNA. RNA quality was determined by both direct observation of rRNA  
592 on 1% denaturing agarose gel and by Agilent bioanalyzer scan. For the preparation of Illumina

593 libraries, 5 µg total RNA per sample was processed with the TruSeq Stranded Total RNA Ribo-  
594 Zero H/M/R kit (RS-122-2201, Illumina). Following rRNA removal, polyA-mRNA species were  
595 separated from the non-polyA RNA pool with the polyA Spin mRNA Isolation Kit (S1560S,  
596 NEB). The two RNA sample pools were further quantified by Qubit (Invitrogen) and 15 ng were  
597 subjected to size fragmentation followed by cDNA synthesis and the addition of a terminal tagged  
598 oligonucleotide. Tagged cDNA was purified with Agencourt AMPure XP beads and amplified  
599 with 15 cycles of PCR. Fragment length distribution of all libraries was analyzed on a BioAnalyzer  
600 high-sensitivity LabChip. Diluted libraries (5 pmol) were multiplexed and sequenced on the  
601 Illumina MiSeq (2- by 250-bp paired-end run with 3 to 4 million reads/sample).

#### 602 *4.4. Analysis of RNAseq data and differential gene expression assay*

603 RNAseq data was analyzed on the EDGE Bioinformatics platform [51]. Using the PiReT  
604 application (<https://github.com/mshakya/piret>), we performed quality control on the RNA-seq data  
605 using FaQC v2.09 [52]. The reads that passed the QC were mapped using HISAT2 v2.1.0 against  
606 its graph FM index (GFM) human reference genome [53]. Htseq-count v0.11.1 was used to  
607 calculate the number of reads mapped to coding sequences [54]. Applying count data, we  
608 calculated transcripts per kilobase per million (TPM) and found differentially expressed genes  
609 using the R package DESeq2 v1.18.1. Heatmaps showing fold change (FC) were made using the  
610 R package heatmap v1.0.10 which clustered both rows and columns based on FC values.

#### 611 *4.5. Data availability.*

612 All transcriptomics data have been submitted to GEO under accession number GSE162295  
613 (<https://www.ncbi.nlm.nih.gov/geo/query/acc.cgi?acc=GSE162295>) and NCBI tracking system  
614 #21497852.

615 4.6. *Western blot analysis and Fluorescent Microscopy*

616 Uninfected cells and cells infected with *A/Port Chalmers/1/73* (H3N2) at MOI5 were  
617 collected after the treatment of interest and were solubilized in RIPA Lysis and Extraction Buffer  
618 (Thermo Scientific, Grand Island, NY) supplemented with a cocktail of protease and phosphatase  
619 inhibitor mixture (Thermo Scientific). Lysates were cleared at 14,000 rpm for 15 minutes, and the  
620 total protein amount in the supernatants was quantified with the BCA kit (Pierce). Equal amounts  
621 of protein (5 µg) were resolved by Tris-Glycine-SDS PAGE electrophoresis (4-15% Mini-  
622 PROTEAN, BioRad, Hercules, CA). After the SDS-PAGE the proteins were transferred onto  
623 PVDF membranes (Millipore, Billerica, MA), blocked with 5% nonfat dried milk in TBST (25  
624 mM Tris [pH 7.6], 137 mM NaCl, and 0.2% Tween 20) and incubated overnight at 4 °C with  
625 primary antibodies in 1% bovine serum albumin in phosphate buffered saline. Membranes washed  
626 from the primary antibodies were incubated for 2 hours in HRP-conjugated secondary antibody  
627 and were analyzed for immunoreactive proteins with luminol reagent (Santa Cruz Biotechnology)  
628 by BioRad Molecular Imager ChemiDoc XRS+. Image Lab 6.0 software was applied for  
629 quantitative analysis of the protein band intensity. The following primary antibodies were used in  
630 this study: anti-actin (sc-58673, 2Q1055); anti-Influenza A Virus M2 Protein [14C2] (ab5416);  
631 anti-Influenza A Virus Nucleoprotein [9C11] (SAB5300169); anti-LC3B (CST-2775); anti-mTOR  
632 [7C10] (CST-2983); anti-phospho-mTOR(S2448) [D9C2] (CST-5536); anti-ULK1 [D8H5] (CST-  
633 8054); anti-phospho-ULK1(S757) [D706U] (CST-14202); anti-SAPK/JNK (CST-9252); anti-  
634 phospho-SAPK/JNK(Thr183/Tyr185) (CST-9251).

635 For the fluorescent microscopy studies, cells were plated on borosilicate chamber slides pre-  
636 coated with fibronectin. IAV-infected and mock-treated samples were fixed with 4%  
637 paraformaldehyde at various time points, incubated in blocking solution (PBS+3% bovine serum

638 albumin) and labeled with mouse anti-Influenza A Virus M2 Protein [14C2] (ab5416). Following  
639 overnight incubation with the anti-IVA/M2 primary antibody, cells were washed in PBS and  
640 permeabilized (PBS+0.25% TritonX) prior to incubation with rabbit anti-LC3B antibody (Sigma,  
641 L7543). Alexa Fluor488 goat anti-mouse (ab150113) and Alexa Fluor555 goat anti-rabbit IgGs  
642 were used to fluorescently label IVA/M2 and LC3B proteins, respectively. Images were obtained  
643 from Zeiss Axio Observer.Z1 using ZenPro software. To determine the percentage of infected  
644 cells, images with fluorescently labeled anti-IVA/M2 antibody were obtained with 20x objective  
645 choosing fields with > 300 cells. For each culture condition, 5 images were taken from non-  
646 overlapping fields and were analyzed with ImageJ. A cell counter plugin was created with the  
647 following parameters: (i) manual threshold, (ii) fill holes, (iii) enhance contrast and saturated pixels  
648 at 0.3%, (iv) watershed separation, and (v) particle analysis at size 100-infinity and circularity at  
649 0.2–0.1. The fraction of cells labeled with anti-viral antibody was calculated as percent of total  
650 cell population labeled with DAPI.

#### 651 4.7. ELISA

652 Endogenous levels of phosphorylated AKT at Ser473 were determined with FastScan™  
653 Phospho-Akt (Ser473) ELISA Kit (Cell Signaling technologies, CST#80895) in cleared cell  
654 lysates of mock treated and virus infected 10<sup>6</sup> A549 cells. Absolute values of phosphorylated  
655 Ser473-AKT were determined with a standard curve correlating the positive control phospho-  
656 Akt(Ser473) concentration (µg/mL) to absorbance at 450 nM. We utilized PathScan Phospho-p70  
657 S6 Kinase (Thr389) Sandwich ELISA kit (Cell Signaling technologies, CST#7063) to determine  
658 mTORC1 activity by measuring the phosphorylated levels of its primary substrate p70S6K. In this  
659 assay the levels of phosphorylated Thr389 (detection antibody) were normalized to the total levels

660 of p70S6K protein (capture antibody). A Bioteck Synergy 2 plate reader was used to collect  
661 absorbance at 450 nm.

#### 662 *4.8. Plasmids and reagents for split-GFP in situ protein-protein interactions*

663 To study direct interaction of IAV M2 and host LC3B proteins, we used a split green  
664 fluorescent protein (GFP) assay, as previously described [55]. gBLOCK Gene Fragments,  
665 encoding for GFP11- and GFP10-tagged M2 and LC3B, were chemically synthesized by Twist  
666 Biosciences Inc. The synthetic DNA contained a set of primer sequences for amplification and  
667 Hind III and EcoR V restriction enzyme sites. The genes also contained methionine required for  
668 the start and a stop codon. The 5' end of all gene constructs contained  
669 CGATTAACGGTCTCTGGGGAAGCTTACCATG the 3'end of the sequences contained  
670 TAAGATATCAAAAGGAGACCGTTAATCTAAAATCATTATTTG. The primers used for  
671 amplification of the constructs were forward primer CGATTAACGGTCTCTGGGG and reverse  
672 primer CAAATAATGATTTTAGATTAACGG. All genes were PCR amplified using Q5 proof  
673 reading polymerase (New England Biolabs, M0491). Purified PCR products encoding the GFP  
674 Tag were cloned into a pcDNA 5.1 vector plasmid encoding influenza A M2 protein [56].  
675 Restriction enzymes Hind III (NEB, #R0104) and EcoRV (NEB # R0195) were used to create  
676 sticky ends on the PCR and plasmid vector, followed by gel extraction and purification (Qiagen  
677 #28706) prior to T4 DNA (NEB, #B0202) ligation. The plasmid vectors encoding tagged-M2 and  
678 LC3B proteins were verified via Sanger sequencing, and the amino acid sequence of the various  
679 constructs are presented in Supplementary material (S3). For the Split GFP assay, the plasmid  
680 vectors encoding for tagged M2 and LC3B proteins were transfected in HEK293T cells with  
681 Lipofectamine 3000 (Thermo Fisher/Invitrogen). At day 3 post-transfection, the cells were fixed  
682 with 4% paraformaldehyde (15 minutes at room temperature) and permeabilized with 0.3% Triton

683 X100 (10 minutes at room temperature). After blocking with 2% BSA in phosphate buffer saline  
684 (PBS), the cells were incubated overnight at 4 °C with purified protein fraction of GFP1-9 (10  
685 µg/mL). Only when in very close proximity the GFP11 and GFP10 peptides can be complimented  
686 with the larger fraction GFP1-9 to produce folded and fluorescent GFP [57]. Imaging was  
687 performed on Zeiss Axio Observer.Z1 and processed with ZenPro software.

688 **Author Contributions:** conceptualization, S. M-V. and T.A.S.B; methodology, S. M-V., T.A.S.B,  
689 N.V., C. D.G., and S.B.; formal analysis, S. M-V., T.A.S.B, S.R.S., and G.X.; investigation, S. M-  
690 V., T.A.S.B., S.R.S., and N.V.; writing – original draft preparation, S. M-V. and T.A.S.B.; writing  
691 – review and editing, S. M-V., T.A.S.B., and N.V.; supervision, S.M-V., S.R.S., and G.W.; funding  
692 acquisition, S.M-V., G.W., and S.R.S.

693 **Funding:** Funding for this work was provided by Los Alamos National Laboratory R&D grants  
694 202000696ER to S.M-V., 20160054DR to G.W., and 20210082DR to S.R.S.

695 **Conflicts of Interest:** The authors declare no conflict of interest  
696

## 697 REFERENCES

- 698 1. Shang, L.; Chen, S.; Du, F.; Li, S.; Zhao, L.; Wang, X., Nutrient starvation elicits an acute autophagic response  
699 mediated by Ulk1 dephosphorylation and its subsequent dissociation from AMPK. *Proc Natl Acad Sci U S A* **2011**,  
700 *108* (12), 4788-4793.
- 701 2. Kim, J.; Kundu, M.; Viollet, B.; Guan, K. L., AMPK and mTOR regulate autophagy through direct  
702 phosphorylation of Ulk1. *Nat Cell Biol* **2011**, *13* (2), 132-41.
- 703 3. Qiang, L.; Sample, A.; Shea, C. R.; Soltani, K.; Macleod, K. F.; He, Y.-Y., Autophagy gene ATG7 regulates  
704 ultraviolet radiation-induced inflammation and skin tumorigenesis. *Autophagy* **2017**, *13* (12), 2086-2103.
- 705 4. Hussey, S.; Travassos, L. H.; Jones, N. L., Autophagy as an emerging dimension to adaptive and innate immunity.  
706 *Seminars in Immunology* **2009**, *21* (4), 233-241.
- 707 5. Kuballa, P.; Nolte, W. M.; Castoreno, A. B.; Xavier, R. J., Autophagy and the Immune System. *Annual Review of*  
708 *Immunology* **2012**, *30* (1), 611-646.
- 709 6. Siqueira, M. d. S.; Ribeiro, R. d. M.; Travassos, L. H., Autophagy and Its Interaction With Intracellular Bacterial  
710 Pathogens. *Frontiers in immunology* **2018**, *9*, 935-935.
- 711 7. Kim, Y. S.; Silwal, P.; Kim, S. Y.; Yoshimori, T.; Jo, E.-K., Autophagy-activating strategies to promote innate  
712 defense against mycobacteria. *Experimental & Molecular Medicine* **2019**, *51* (12), 1-10.
- 713 8. Abdulrahman, B. A.; Khweek, A. A.; Akhter, A.; Caution, K.; Kotrange, S.; Abdelaziz, D. H. A.; Newland, C.;  
714 Rosales-Reyes, R.; Kopp, B.; McCoy, K.; Montione, R.; Schlesinger, L. S.; Gavrillin, M. A.; Wewers, M. D.;  
715 Valvano, M. A.; Amer, A. O., Autophagy stimulation by rapamycin suppresses lung inflammation and infection  
716 by Burkholderia cenocepacia in a model of cystic fibrosis. *Autophagy* **2011**, *7* (11), 1359-1370.
- 717 9. Paul, P.; Münz, C., Autophagy and Mammalian Viruses: Roles in Immune Response, Viral Replication, and  
718 Beyond. *Adv Virus Res* **2016**, *95*, 149-95.
- 719 10. Deretic, V.; Saitoh, T.; Akira, S., Autophagy in infection, inflammation and immunity. *Nature Reviews Immunology*  
720 **2013**, *13* (10), 722-737.

- 721 11. Saitoh, T.; Fujita, N.; Jang, M. H.; Uematsu, S.; Yang, B. G.; Satoh, T.; Omori, H.; Noda, T.; Yamamoto, N.;  
722 Komatsu, M.; Tanaka, K.; Kawai, T.; Tsujimura, T.; Takeuchi, O.; Yoshimori, T.; Akira, S., Loss of the autophagy  
723 protein Atg16L1 enhances endotoxin-induced IL-1beta production. *Nature* **2008**, *456* (7219), 264-8.
- 724 12. Harris, J.; Hartman, M.; Roche, C.; Zeng, S. G.; O'Shea, A.; Sharp, F. A.; Lambe, E. M.; Creagh, E. M.; Golenbock,  
725 D. T.; Tschopp, J.; Kornfeld, H.; Fitzgerald, K. A.; Lavelle, E. C., Autophagy controls IL-1beta secretion by  
726 targeting pro-IL-1beta for degradation. *J Biol Chem* **2011**, *286* (11), 9587-97.
- 727 13. Valečka, J.; Almeida, C. R.; Su, B.; Pierre, P.; Gatti, E., Autophagy and MHC-restricted antigen presentation. *Mol*  
728 *Immunol* **2018**, *99*, 163-170.
- 729 14. Mintern, J. D.; Macri, C.; Chin, W. J.; Panozza, S. E.; Segura, E.; Patterson, N. L.; Zeller, P.; Bourges, D.; Bedoui,  
730 S.; McMillan, P. J.; Idris, A.; Nowell, C. J.; Brown, A.; Radford, K. J.; Johnston, A. P.; Villadangos, J. A.,  
731 Differential use of autophagy by primary dendritic cells specialized in cross-presentation. *Autophagy* **2015**, *11* (6),  
732 906-17.
- 733 15. Levine, B.; Kroemer, G., Biological Functions of Autophagy Genes: A Disease Perspective. *Cell* **2019**, *176* (1-2), 11-  
734 42.
- 735 16. Mizushima, N.; Yoshimori, T.; Levine, B., Methods in mammalian autophagy research. *Cell* **2010**, *140* (3), 313-326.
- 736 17. Liang, X. H.; Kleeman, L. K.; Jiang, H. H.; Gordon, G.; Goldman, J. E.; Berry, G.; Herman, B.; Levine, B.,  
737 Protection against fatal Sindbis virus encephalitis by beclin, a novel Bcl-2-interacting protein. *J Virol* **1998**, *72* (11),  
738 8586-96.
- 739 18. Campbell, G. R.; Spector, S. A., Hormonally active vitamin D3 (1alpha,25-dihydroxycholecalciferol) triggers  
740 autophagy in human macrophages that inhibits HIV-1 infection. *J Biol Chem* **2011**, *286* (21), 18890-902.
- 741 19. Shoji-Kawata, S.; Sumpter, R.; Leveno, M.; Campbell, G. R.; Zou, Z.; Kinch, L.; Wilkins, A. D.; Sun, Q.; Pallauf,  
742 K.; MacDuff, D.; Huerta, C.; Virgin, H. W.; Helms, J. B.; Eerland, R.; Tooze, S. A.; Xavier, R.; Lenschow, D. J.;  
743 Yamamoto, A.; King, D.; Lichtarge, O.; Grishin, N. V.; Spector, S. A.; Kaloyanova, D. V.; Levine, B., Identification  
744 of a candidate therapeutic autophagy-inducing peptide. *Nature* **2013**, *494* (7436), 201-206.
- 745 20. Kobayashi, S.; Yoshii, K.; Phongphaew, W.; Muto, M.; Hirano, M.; Orba, Y.; Sawa, H.; Kariwa, H., West Nile  
746 virus capsid protein inhibits autophagy by AMP-activated protein kinase degradation in neurological disease  
747 development. *PLoS Pathog* **2020**, *16* (1), e1008238-e1008238.
- 748 21. Levine, B.; Mizushima, N.; Virgin, H. W., Autophagy in immunity and inflammation. *Nature* **2011**, *469* (7330),  
749 323-335.
- 750 22. Li, J.; Liu, Y.; Wang, Z.; Liu, K.; Wang, Y.; Liu, J.; Ding, H.; Yuan, Z., Subversion of cellular autophagy machinery  
751 by hepatitis B virus for viral envelopment. *Journal of virology* **2011**, *85* (13), 6319-6333.
- 752 23. Starr, T.; Child, R.; Wehrly, T. D.; Hansen, B.; Hwang, S.; López-Otin, C.; Virgin, H. W.; Celli, J., Selective  
753 subversion of autophagy complexes facilitates completion of the Brucella intracellular cycle. *Cell Host Microbe*  
754 **2012**, *11* (1), 33-45.
- 755 24. Kyei, G. B.; Dinkins, C.; Davis, A. S.; Roberts, E.; Singh, S. B.; Dong, C.; Wu, L.; Kominami, E.; Ueno, T.;  
756 Yamamoto, A.; Federico, M.; Panganiban, A.; Vergne, I.; Deretic, V., Autophagy pathway intersects with HIV-1  
757 biosynthesis and regulates viral yields in macrophages. *The Journal of cell biology* **2009**, *186* (2), 255-268.
- 758 25. Sriwilaijaroen, N.; Suzuki, Y., Host Receptors of Influenza Viruses and Coronaviruses-Molecular Mechanisms of  
759 Recognition. *Vaccines (Basel)* **2020**, *8* (4).
- 760 26. Smith, G. J.; Vijaykrishna, D.; Bahl, J.; Lycett, S. J.; Worobey, M.; Pybus, O. G.; Ma, S. K.; Cheung, C. L.;  
761 Raghwani, J.; Bhatt, S.; Peiris, J. S.; Guan, Y.; Rambaut, A., Origins and evolutionary genomics of the 2009 swine-  
762 origin H1N1 influenza A epidemic. *Nature* **2009**, *459* (7250), 1122-5.
- 763 27. Viboud, C.; Gostic, K.; Nelson, M. I.; Price, G. E.; Perofsky, A.; Sun, K.; Sequeira Trovão, N.; Cowling, B. J.;  
764 Epstein, S. L.; Spiro, D. J., Beyond clinical trials: Evolutionary and epidemiological considerations for  
765 development of a universal influenza vaccine. *PLoS Pathog* **2020**, *16* (9), e1008583-e1008583.
- 766 28. Nelson, M. I.; Simonsen, L.; Viboud, C.; Miller, M. A.; Holmes, E. C., The origin and global emergence of  
767 adamantane resistant A/H3N2 influenza viruses. *Virology* **2009**, *388* (2), 270-8.



- 768 29. Simonsen, L.; Viboud, C.; Grenfell, B. T.; Dushoff, J.; Jennings, L.; Smit, M.; Macken, C.; Hata, M.; Gog, J.;  
769 Miller, M. A.; Holmes, E. C., The genesis and spread of reassortment human influenza A/H3N2 viruses conferring  
770 adamantane resistance. *Mol Biol Evol* **2007**, *24* (8), 1811-20.
- 771 30. Sun, Y.; Li, C.; Shu, Y.; Ju, X.; Zou, Z.; Wang, H.; Rao, S.; Guo, F.; Liu, H.; Nan, W.; Zhao, Y.; Yan, Y.; Tang,  
772 J.; Zhao, C.; Yang, P.; Liu, K.; Wang, S.; Lu, H.; Li, X.; Tan, L.; Gao, R.; Song, J.; Gao, X.; Tian, X.; Qin, Y.;  
773 Xu, K.-F.; Li, D.; Jin, N.; Jiang, C., Inhibition of Autophagy Ameliorates Acute Lung Injury Caused by Avian  
774 Influenza A H5N1 Infection. *Science Signaling* **2012**, *5* (212), ra16.
- 775 31. Kuss-Duerkop, S. K.; Wang, J.; Mena, I.; White, K.; Metreveli, G.; Sakthivel, R.; Mata, M. A.; Muñoz-Moreno,  
776 R.; Chen, X.; Krammer, F.; Diamond, M. S.; Chen, Z. J.; García-Sastre, A.; Fontoura, B. M. A., Influenza virus  
777 differentially activates mTORC1 and mTORC2 signaling to maximize late stage replication. *PLoS Pathog* **2017**, *13*  
778 (9), e1006635-e1006635.
- 779 32. Zhou, Z.; Jiang, X.; Liu, D.; Fan, Z.; Hu, X.; Yan, J.; Wang, M.; Gao, G. F., Autophagy is involved in influenza  
780 A virus replication. *Autophagy* **2009**, *5* (3), 321-8.
- 781 33. Zhirnov, O. P.; Klenk, H. D., Influenza A virus proteins NS1 and hemagglutinin along with M2 are involved in  
782 stimulation of autophagy in infected cells. *J Virol* **2013**, *87* (24), 13107-14.
- 783 34. Ma, X. M.; Blenis, J., Molecular mechanisms of mTOR-mediated translational control. *Nat Rev Mol Cell Biol* **2009**,  
784 *10* (5), 307-18.
- 785 35. Laplante, M.; Sabatini, D. M., mTOR signaling in growth control and disease. *Cell* **2012**, *149* (2), 274-93.
- 786 36. Jung, C. H.; Jun, C. B.; Ro, S. H.; Kim, Y. M.; Otto, N. M.; Cao, J.; Kundu, M.; Kim, D. H., ULK-Atg13-FIP200  
787 complexes mediate mTOR signaling to the autophagy machinery. *Mol Biol Cell* **2009**, *20* (7), 1992-2003.
- 788 37. Ganley, I. G.; Lam du, H.; Wang, J.; Ding, X.; Chen, S.; Jiang, X., ULK1.ATG13.FIP200 complex mediates mTOR  
789 signaling and is essential for autophagy. *J Biol Chem* **2009**, *284* (18), 12297-305.
- 790 38. Ma, J.; Sun, Q.; Mi, R.; Zhang, H., Avian influenza A virus H5N1 causes autophagy-mediated cell death through  
791 suppression of mTOR signaling. *J Genet Genomics* **2011**, *38* (11), 533-7.
- 792 39. Zhang, C.; Yang, Y.; Zhou, X.; Liu, X.; Song, H.; He, Y.; Huang, P., Highly pathogenic avian influenza A virus  
793 H5N1 NS1 protein induces caspase-dependent apoptosis in human alveolar basal epithelial cells. *Virol J* **2010**, *7*,  
794 51.
- 795 40. Lam, W. Y.; Tang, J. W.; Yeung, A. C.; Chiu, L. C.; Sung, J. J.; Chan, P. K., Avian influenza virus  
796 A/HK/483/97(H5N1) NS1 protein induces apoptosis in human airway epithelial cells. *J Virol* **2008**, *82* (6), 2741-51.
- 797 41. Zhirnov, O. P.; Klenk, H. D., Control of apoptosis in influenza virus-infected cells by up-regulation of Akt and  
798 p53 signaling. *Apoptosis* **2007**, *12* (8), 1419-32.
- 799 42. Ehrhardt, C.; Wolff, T.; Pleschka, S.; Planz, O.; Beermann, W.; Bode, J. G.; Schmolke, M.; Ludwig, S., Influenza  
800 A virus NS1 protein activates the PI3K/Akt pathway to mediate antiapoptotic signaling responses. *J Virol* **2007**, *81*  
801 (7), 3058-67.
- 802 43. Shin, Y. K.; Li, Y.; Liu, Q.; Anderson, D. H.; Babiuk, L. A.; Zhou, Y., SH3 binding motif 1 in influenza A virus  
803 NS1 protein is essential for PI3K/Akt signaling pathway activation. *J Virol* **2007**, *81* (23), 12730-9.
- 804 44. Beale, R.; Wise, H.; Stuart, A.; Ravenhill, B. J.; Digard, P.; Randow, F., A LC3-interacting motif in the influenza  
805 A virus M2 protein is required to subvert autophagy and maintain virion stability. *Cell Host Microbe* **2014**, *15* (2),  
806 239-47.
- 807 45. Gannagé, M.; Dormann, D.; Albrecht, R.; Dengjel, J.; Torossi, T.; Rämer, P. C.; Lee, M.; Strowig, T.; Arrey, F.;  
808 Conenello, G.; Pypaert, M.; Andersen, J.; García-Sastre, A.; Münz, C., Matrix protein 2 of influenza A virus blocks  
809 autophagosome fusion with lysosomes. *Cell Host Microbe* **2009**, *6* (4), 367-80.
- 810 46. Eliopoulos, A. G.; Blake, S. M.; Floettmann, J. E.; Rowe, M.; Young, L. S., Epstein-Barr virus-encoded latent  
811 membrane protein 1 activates the JNK pathway through its extreme C terminus via a mechanism involving  
812 TRADD and TRAF2. *J Virol* **1999**, *73* (2), 1023-35.
- 813 47. McLean, T. I.; Bachenheimer, S. L., Activation of cJUN N-terminal kinase by herpes simplex virus type 1 enhances  
814 viral replication. *J Virol* **1999**, *73* (10), 8415-26.
- 815 48. Clarke, P.; Meintzer, S. M.; Widmann, C.; Johnson, G. L.; Tyler, K. L., Reovirus infection activates JNK and the  
816 JNK-dependent transcription factor c-Jun. *J Virol* **2001**, *75* (23), 11275-83.

- 817 49. Nacken, W.; Anhlan, D.; Hrincius, E. R.; Mostafa, A.; Wolff, T.; Sadewasser, A.; Pleschka, S.; Ehrhardt, C.;  
818 Ludwig, S., Activation of c-jun N-terminal kinase upon influenza A virus (IAV) infection is independent of  
819 pathogen-related receptors but dependent on amino acid sequence variations of IAV NS1. *J Virol* **2014**, *88* (16),  
820 8843-52.
- 821 50. Szretter, K. J.; Balish, A. L.; Katz, J. M., Influenza: Propagation, Quantification, and Storage. *Current Protocols in*  
822 *Microbiology* **2006**, *3* (1), 15G.1.1-15G.1.22.
- 823 51. Li, P. E.; Lo, C. C.; Anderson, J. J.; Davenport, K. W.; Bishop-Lilly, K. A.; Xu, Y.; Ahmed, S.; Feng, S.; Mokashi,  
824 V. P.; Chain, P. S., Enabling the democratization of the genomics revolution with a fully integrated web-based  
825 bioinformatics platform. *Nucleic Acids Res* **2017**, *45* (1), 67-80.
- 826 52. Lo, C.-C.; Chain, P. S. G., Rapid evaluation and quality control of next generation sequencing data with FaQCs.  
827 *BMC Bioinformatics* **2014**, *15* (1), 366.
- 828 53. Kim, D.; Paggi, J. M.; Park, C.; Bennett, C.; Salzberg, S. L., Graph-based genome alignment and genotyping with  
829 HISAT2 and HISAT-genotype. *Nature Biotechnology* **2019**, *37* (8), 907-915.
- 830 54. Anders, S.; Pyl, P. T.; Huber, W., HTSeq—a Python framework to work with high-throughput sequencing data.  
831 *Bioinformatics* **2015**, *31* (2), 166-169.
- 832 55. Cabantous, S.; Terwilliger, T. C.; Waldo, G. S., Protein tagging and detection with engineered self-assembling  
833 fragments of green fluorescent protein. *Nature Biotechnology* **2005**, *23* (1), 102-107.
- 834 56. Gabbard, J.; Velappan, N.; Di Niro, R.; Schmidt, J.; Jones, C. A.; Tompkins, S. M.; Bradbury, A. R. M., A  
835 humanized anti-M2 scFv shows protective in vitro activity against influenza. *Protein Engineering, Design and*  
836 *Selection* **2009**, *22* (3), 189-198.
- 837 57. Cabantous, S.; Nguyen, H. B.; Pedelacq, J.-D.; Koraichi, F.; Chaudhary, A.; Ganguly, K.; Lockard, M. A.; Favre,  
838 G.; Terwilliger, T. C.; Waldo, G. S., A New Protein-Protein Interaction Sensor Based on Tripartite Split-GFP  
839 Association. *Scientific Reports* **2013**, *3* (1), 2854.
- 840 58. Zhirnov, O. P.; Ikizler, M. R.; Wright, P. F., Cleavage of Influenza A Virus Hemagglutinin in Human Respiratory  
841 Epithelium Is Cell Associated and Sensitive to Exogenous Antiproteases. *Journal of Virology* **2002**, *76* (17), 8682.
- 842 59. Klenk, H.-D.; Garten, W., Host cell proteases controlling virus pathogenicity. *Trends in Microbiology* **1994**, *2* (2), 39-  
843 43.
- 844 60. Steinhauer, D. A., Role of Hemagglutinin Cleavage for the Pathogenicity of Influenza Virus. *Virology* **1999**, *258* (1),  
845 1-20.
- 846 61. Wang, R.; Zhu, Y.; Zhao, J.; Ren, C.; Li, P.; Chen, H.; Jin, M.; Zhou, H., Autophagy Promotes Replication of  
847 Influenza A Virus In Vitro. *Journal of virology* **2019**, *93* (4), e01984-18.
- 848 62. Napolitano, G.; Ballabio, A., TFEB at a glance. *Journal of Cell Science* **2016**, *129* (13), 2475.
- 849 63. Carriere, A.; Romeo, Y.; Acosta-Jaquez, H. A.; Moreau, J.; Bonneil, E.; Thibault, P.; Fingar, D. C.; Roux, P. P.,  
850 ERK1/2 phosphorylate Raptor to promote Ras-dependent activation of mTOR complex 1 (mTORC1). *The Journal*  
851 *of biological chemistry* **2011**, *286* (1), 567-577.
- 852 64. Zoncu, R.; Efeyan, A.; Sabatini, D. M., mTOR: from growth signal integration to cancer, diabetes and ageing. *Nat*  
853 *Rev Mol Cell Biol* **2011**, *12* (1), 21-35.
- 854 65. Xu, F.; Na, L.; Li, Y.; Chen, L., Roles of the PI3K/AKT/mTOR signalling pathways in neurodegenerative diseases  
855 and tumours. *Cell & Bioscience* **2020**, *10* (1), 54.
- 856 66. Mendoza, M. C.; Er, E. E.; Blenis, J., The Ras-ERK and PI3K-mTOR pathways: cross-talk and compensation. *Trends*  
857 *Biochem Sci* **2011**, *36* (6), 320-328.
- 858 67. Inoki, K.; Ouyang, H.; Zhu, T.; Lindvall, C.; Wang, Y.; Zhang, X.; Yang, Q.; Bennett, C.; Harada, Y.; Stankunas,  
859 K.; Wang, C.-y.; He, X.; MacDougald, O. A.; You, M.; Williams, B. O.; Guan, K.-L., TSC2 Integrates Wnt and  
860 Energy Signals via a Coordinated Phosphorylation by AMPK and GSK3 to Regulate Cell Growth. *Cell* **2006**, *126*  
861 (5), 955-968.
- 862 68. Raciti, M.; Lotti, L. V.; Valia, S.; Pulcinelli, F. M.; Di Renzo, L., JNK2 is activated during ER stress and promotes  
863 cell survival. *Cell Death & Disease* **2012**, *3* (11), e429-e429.
- 864 69. Wei, Y.; Pattingre, S.; Sinha, S.; Bassik, M.; Levine, B., JNK1-mediated phosphorylation of Bcl-2 regulates  
865 starvation-induced autophagy. *Mol Cell* **2008**, *30* (6), 678-688.

- 866 70. Yamamoto, K.; Ichijo, H.; Korsmeyer, S. J., BCL-2 Is Phosphorylated and Inactivated by an ASK1/Jun N-Terminal  
867 Protein Kinase Pathway Normally Activated at G<sub>2</sub>/M. *Molecular and Cellular Biology* **1999**,  
868 19 (12), 8469.
- 869 71. Holsinger, L. J.; Lamb, R. A., Influenza virus M2 integral membrane protein is a homotetramer stabilized by  
870 formation of disulfide bonds. *Virology* **1991**, 183 (1), 32-43.
- 871 72. Sabatini, D. M., Twenty-five years of mTOR: Uncovering the link from nutrients to growth. *Proceedings of the*  
872 *National Academy of Sciences* **2017**, 114 (45), 11818.
- 873 73. Oh, W. J.; Jacinto, E., mTOR complex 2 signaling and functions. *Cell Cycle* **2011**, 10 (14), 2305-2316.
- 874 74. Jung, C. H.; Seo, M.; Otto, N. M.; Kim, D. H., ULK1 inhibits the kinase activity of mTORC1 and cell proliferation.  
875 *Autophagy* **2011**, 7 (10), 1212-21.
- 876 75. Dunlop, E. A.; Hunt, D. K.; Acosta-Jaquez, H. A.; Fingar, D. C.; Tee, A. R., ULK1 inhibits mTORC1 signaling,  
877 promotes multisite Raptor phosphorylation and hinders substrate binding. *Autophagy* **2011**, 7 (7), 737-747.
- 878 76. Luo, Y.; Xu, W.; Li, G.; Cui, W., Weighing In on mTOR Complex 2 Signaling: The Expanding Role in Cell  
879 Metabolism. *Oxidative Medicine and Cellular Longevity* **2018**, 2018, 7838647.
- 880 77. Sarbassov, D. D.; Ali, S. M.; Kim, D. H.; Guertin, D. A.; Latek, R. R.; Erdjument-Bromage, H.; Tempst, P.;  
881 Sabatini, D. M., Rictor, a novel binding partner of mTOR, defines a rapamycin-insensitive and raptor-independent  
882 pathway that regulates the cytoskeleton. *Curr Biol* **2004**, 14 (14), 1296-302.
- 883 78. Corona Velazquez, A.; Corona, A. K.; Klein, K. A.; Jackson, W. T., Poliovirus induces autophagic signaling  
884 independent of the ULK1 complex. *Autophagy* **2018**, 14 (7), 1201-1213.
- 885 79. Roczniak-Ferguson A., Petit C.S., Froehlich F., Qian S., Ky J., Angarola B., Walther T.C., Ferguson S.M., The  
886 Transcription Factor TFEB Links mTORC1 Signaling to Transcriptional Control of Lysosome Homeostasis. *Sci*  
887 *Signal.* 2012 Jun 12;5(228):ra42.
- 888 80. Calderon BM, Danzy S, Delima GK, Jacobs NT, Ganti K, et al. Dysregulation of M segment gene expression contributes to  
889 influenza A virus host restriction. *PLOS Path.* 2019, 15(8): e1007892.
- 890 81. Zhang J, Ruan T, Sheng T, Wang J, Sun J, Wang J, Prinz RA, Peng D, Liu X, Xu X. Role of c-Jun terminal kinase  
891 (JNK) activation in influenza A virus-induced autophagy and replication. *Virology.* 2019 Jan 2; 526:1-12.
- 892 82. Martin KR, Celano SL, Solitro AR, Gunaydin H, Scott M, O'Hagan RC, Shumway SD, Fuller P, MacKeigan JP. A  
893 Potent and Selective ULK1 Inhibitor Suppresses Autophagy and Sensitizes Cancer Cells to Nutrient Stress.  
894 *iScience.* 2018 Oct 26;8:74-84.
- 895 83. Egan DF, Chun MG, Vamos M, Zou H, Rong J, Miller CJ, Lou HJ, Raveendra-Panickar D, Yang CC, Sheffler DJ,  
896 Teriete P, Asara JM, Turk BE, Cosford ND, Shaw RJ. Small Molecule Inhibition of the Autophagy Kinase ULK1  
897 and Identification of ULK1 Substrates. *Mol Cell.* 2015 Jul 16;59(2):285-97.
- 898 84. Liu S, Xu SW, Kennedy L, Pala D, Chen Y, Eastwood M, Carter DE, Black CM, Abraham DJ, Leask A. FAK is  
899 required for TGFbeta-induced JNK phosphorylation in fibroblasts: implications for acquisition of a matrix-  
900 remodeling phenotype. *Mol Biol Cell.* 2007 Jun;18(6):2169-78.

901  
902 **FIGURE LEGENDS**

903  
904 **Figure 1.** The activation dynamics of genes involved in autophagy regulation are determined  
905 by IAV titer. Accumulation of viral transcripts **(A)** and autophagy regulating gene transcripts  
906 **(B)** in A549 cells at early (1-3 hpi), mid (6-8 hpi), and late stage (12 hpi) of the viral replication  
907 cycle at two multiplicities of infection (MOI) as determined by RNA-seq analysis (FDR-  
908 corrected  $p < 0.01$ ). **(B)** Dendrograms of the hierarchical clustering of DGE show significant

909 difference in gene expression dynamics at the two MOIs. (C) Schematic of the autophagy  
910 pathway showing key regulatory proteins involved in each step of autophagosome formation.

911 **Figure 2.** Transcriptional activation of mTORC and ULK1 pathways in IAV-infected A549  
912 cells. Gene activation dynamics were determined in A549 cells infected with IAV *P/Ch/1/73*  
913 at MOI1 and MOI5 versus mock treated cells at 1, 3, 4, 6, 8, and 12 hpi. Fold change  
914 differences of gene expression levels in IAV-infected relative to mock-treated cells are  
915 statistically significant between the two groups (FDR-corrected  $p < 0.01$ ).

916 **Figure 3.** Activation of autophagy in IAV *P/Ch/1/73* infected A549 cells is not dependent on ULK-  
917 S757 phosphorylation by mTORC1. (A) Western blot analysis was performed on total protein isolated  
918 from IAV-infected (+) and mock-treated (-) A549 cells at mid (6 hpi) and later stage (7-8 hpi) of virus  
919 replication cycle. The ratio between lipidated (LC3B-II) and unprocessed (LC3B-I) forms of  
920 MAP1LC3B protein was used to determine the autophagy activation event. The activation status of  
921 mTOR and ULK1 proteins was determined as ratio between the mTOR-S2448 and ULK1-S757  
922 phosphorylated versus respective total proteins. Untreated and SBI0206965 [10  $\mu$ M] treated A549  
923 cells were infected with IAV *P/Ch/1/73* at MOI5 and total protein was collected at the indicated hours  
924 post infection (hpi) together with the time-matched mock treated samples. Accumulation of the viral  
925 nucleoprotein (NP) and matrix 2 (M2) protein was analyzed relative to beta-Actin protein levels. (B)  
926 Quantitative analysis of protein band densities was performed on five independent experiments with  
927 Image Lab 6.0 (BioRad). Shown are the mean and standard deviations. (C) Fluorescent microscopy of  
928 A549 cells mock-treated or infected with IAV *P/Ch/1/73* at MOI5. A549 cells treated with the ULK  
929 inhibitor, SBI0206965 [10  $\mu$ M], were equally infected and processed. Cells were fixed 8 hpi and were  
930 treated with primary antibodies against LC3B protein (red) and IAV matrix 2 (green). The cell nuclei  
931 were stained with DAPI (blue). The yellow arrows indicate at autophagosome formations. The white

932 scale bar corresponds to 10  $\mu$ m. Shown is a representative of 3 independent biological replicas of IAV  
933 infected A549 cells.

934 **Figure 4.** Phosphorylation of SAPK/JNK-Thr183/Tyr185 coincides with AKT-pSer473 anti-  
935 apoptotic signaling and is essential for viral protein accumulation in IAV *P/Ch/1/73* infected  
936 A549 cells. (A) The mTORC1 and mTORC2 activity was deduced from the phosphorylation  
937 status of their corresponding substrates, p70S6K-Thr389 and AKT-S473, in IAV-infected  
938 (MOI1) cells. (B) mTORC1 activity was measured at later stage of IAV infection (6 and 8  
939 hpi) at MOI 1, 5, and 10. (C) Western blot analysis of phosphorylated JNK-Thr183/Tyr185,  
940 total JNK, and IAV nucleocapsid protein (IAV-NP) in samples isolated from virus-infected  
941 (V) A549 cells at MOI5 and mock-treated (M) cells. JNK signaling was consequently  
942 activated with accumulation of viral protein at mid-to-late stage of the virus replication cycle.  
943 (D) Western blot analysis shows that chemical inhibition of SAPK/JNK signaling with  
944 SP600125 [10  $\mu$ M] resulted in inhibition of virus protein (IAV-M2) accumulation in A549  
945 cells. In the same samples, increase in the LC3B-II/LC3B-I ratio indicate that high viral  
946 protein levels are responsible for the SAPK/JNK and autophagy activation. Shown is a  
947 representative of four independent virus infection (MOI5) experiments.

948 **Figure 5.** Non-cancer lung bronchial epithelial cells exhibit higher dependence on JNK  
949 signaling for production of infectious IAV particles. (A) Chemical inhibition of ULK  
950 (SBI0206965 [1  $\mu$ M]) and JNK (SP600125 [5  $\mu$ M]) signaling showed divergent effects on the  
951 production of viral protein and LC3B in normal human bronchial epithelial cells (NHBE).  
952 Shown is a representative of three independent Western blot experiments of later stage (24  
953 hpi) IAV infection at MOI5. (B) Immunofluorescence with antibodies targeting LC3B and  
954 IAV protein M2 demonstrated the effect of JNK-phT183 inhibition on the reduction of virus-

955 infected NHBEC. Images were acquired 24 hpi at MOI5. The white scale bar corresponds to  
956 60  $\mu\text{m}$ . The graph presents the percent of cells harboring viral M2 protein. Image  
957 quantification of IAV-M2-labeled cells was performed on  $> 300$  cells in random fields for  
958 four independent infection experiments. (C) Inhibition of virus protein synthesis was  
959 consistent with reduction of infectious virus load, measured as plaque forming units per mL  
960 conditioned media (PFU/mL), generated by A549, BEAS-2B, and NHBE treated with  
961 inhibitors of ULK or JNK signaling compared to the not treated (NT) controls. The PFU/mL  
962 were determined 40 hpi with IAV-*A/PCh/1/73* at MOI5. The statistical significance of the  
963 results was determined from four independent infection experiments with Student t-test (\*  $p$   
964  $< 0.01$  and \*\*  $p < 0.001$ ).

965 **Figure 6.** IAV-M2 recruits LC3B in the cell membranes. Fluorescent microscopy of  
966 HEK293T cells transfected with plasmids expressing G10- and G11-tagged IAV-M2 and  
967 LC3B proteins demonstrate that direct interaction between the two proteins occur on the cell  
968 plasma membrane or intracellular membranous vesicles. Shown are images of split-GFP  
969 complementation assay 48 hours after transfection of HE293T cells with the corresponding  
970 plasmids. The GFP1-9 scaffold was supplied as purified and folded protein in fixed and  
971 permeabilized cells.

## 972 **Supplementary Materials:**

973

974 **Figure S1:** Microscopic analysis of TFEB cellular localization in serum sufficient and serum  
975 starved A549 cells infected with IAV *A/Port Chalmers/1/73* (H3N2) at MOI1. Time laps  
976 microscopy of A549 cell line with stable expression of TFEB fused to GFP demonstrated that the  
977 autophagy regulating transcription factor localized within the cell nucleus within 40 min of serum

978 starvation during the virus absorption phase in both virus infected and MOCK-treated cells (A).  
979 The scale bar equals 10µm. The phosphorylated levels of mTORC1 substrate, ribosomal protein  
980 p70S6K1, sharply decreased in both IAV infected and MOCK-treated cells during the virus  
981 absorption phase in serum-depleted media (B). ELISA data from three independent infection  
982 experiments presents the ratio between sample absorbance at each indicated time point relative to  
983 time-0 sample absorbance. The replication efficiencies of H3N2 and H1N1 (*A/Puerto Rico/8/34*)  
984 IAV subtypes varied significantly in A549 cell line (D) as measured by plaque forming units assay  
985 (PFU). Shown are the results from three independent infection experiments at MOI 5. Time-lapse  
986 microscopy of A549 cell line with stable expression of TFEB-GFP showed accumulation of the  
987 autophagy master regulator in the cell nucleus on the second hour of infection that followed the 1h  
988 (60") virus absorption phase (E) in serum replete medium. The scale bar equals 10µm.

989 **Figure S2:** Schematic presentation of mTORC signaling pathways with differential activation  
990 patterns of key regulatory genes at 1 and 5 MOI of IAV *A/Port Chalmers/1/73* (H3N2)

991 **Figure S3:** (A) Western blot (WB) analysis of IAV protein accumulation, NP and M2, and (B)  
992 flow cytometry analysis of infected A549 cells at two different MOIs demonstrate the limitations  
993 of WB sensitivity when protein accumulation dynamics are studied. (C) Western Blot analysis of  
994 phosphorylated Thr183-JNK accumulation in A549 cells infected with the IAV H1N1 subtype  
995 (MOI 5) reveals correlation between host cell permissiveness to virus replication and activation of  
996 JNK signaling. Shown is a representative of three independent virus infection experiments.

997

998 **Table S1:** Sequences of viral (M2) and host (LC3B) proteins tagged with GFP fragments for tri-  
999 party complementation assay *in situ*.

|                 |                                                                                                                                                                            |
|-----------------|----------------------------------------------------------------------------------------------------------------------------------------------------------------------------|
| GFP11-M2        | MEKRDHMLLEYVTAAGITDASGTDVGSGGGSGGGGSGGSSLLTEVE<br>TPIRNEWGCRCNDSSDPLVVAASIIGILHLILWILDRLFFKCIYRFFEHL<br>KRGPESTEGVPESMREEYRKEQQSAVDADDSHFVSIELE*                           |
| M2 –GFP11       | MSLLTEVETPIRNEWGCRCNDSSDPLVVAASIIGILHLILWILDRLFFKCI<br>YRFFEHLKRGPESTEGVPESMREEYRKEQQSAVDADDSHFVSIELEGG<br>SGGGGSGGGSGGGSTSEKRDHMLLEYVTAAGITDAS*                           |
| GFP10-M2        | MDLPDDHYLSTQTILSKDLNGTDVGSGGGSGGGGSGGSSLLTEVETPIR<br>NEWGCRCNDSSDPLVVAASIIGILHLILWILDRLFFKCIYRFFEHLKRG<br>PESTEGVPESMREEYRKEQQSAVDADDSHFVSIELE*                            |
| M2-GFP10        | MSLLTEVETPIRNEWGCRCNDSSDPLVVAASIIGILHLILWILDRLFFKCI<br>YRFFEHLKRGPESTEGVPESMREEYRKEQQSAVDADDSHFVSIELEGG<br>SGGGGSGGGSGGGSTSDLPDDHYLSTQTILSKDLN*                            |
| GFP10 –<br>LC3B | MDLPDDHYLSTQTILSKDLNGTDVGSGGGSGGGGSGGSMPSKTFKQR<br>RTFEQVEDVRLIREQHPTKIPVIERYKGEKQLPVLDTKFLVPDHVN<br>MSELIKIIRRLQLNANQAFLLVNGHSMVSVSTPISEVYESEKDEDGFL<br>YMVYASQETFGMKLSV* |
| LC3B-<br>GFP10  | MPSEKTFKQRRTFEQVEDVRLIREQHPTKIPVIERYKGEKQLPVLDT<br>KFLVPDHVNMSELIKIIRRLQLNANQAFLLVNGHSMVSVSTPISEVYE<br>SEKDEDGFLYMVYASQETFGMKLSVGGSGGGGSGGGSGGGSTSDL<br>PDDHYLSTQTILSKDLN* |

1003



1  
2  
3  
4  
5  
6  
7  
8  
9  
10  
11  
12  
13  
14  
15  
16  
17  
18  
19  
20  
21  
22  
23  
24  
25  
26  
27  
28  
29  
30  
31  
32  
33  
34  
35  
36  
37  
38  
39  
40  
41  
42  
43  
44  
45  
46  
47  
48  
49  
50  
51  
52  
53  
54  
55  
56  
57  
58  
59  
60

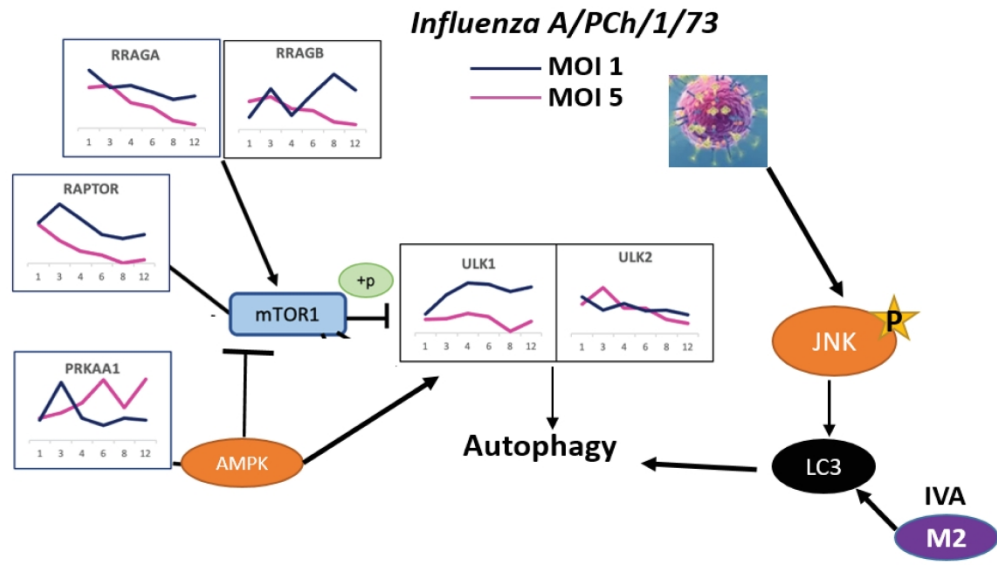

Genes regulating mTORC1 and ULK1 pathways are simultaneously activated in Influenza A infected lung cells. The activation profile of mTORC1 and autophagy regulating genes is influenced by the viral load. Stress-activated protein kinase (SAPK/JNK) signaling is triggered by high viral protein load and coincides with activation of autophagy.

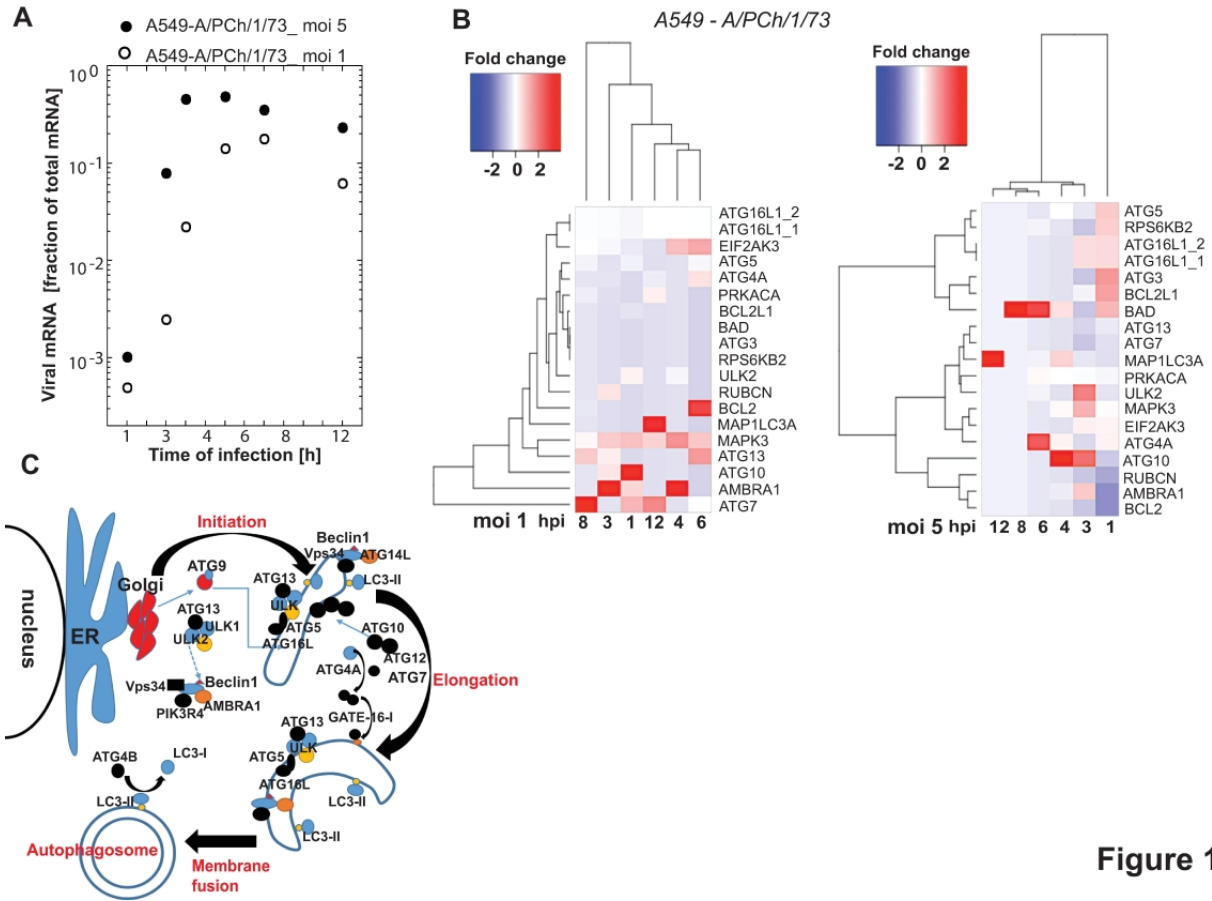

Figure 1

Figure 1. IAV load strongly influenced the activation dynamics of genes involved in autophagy regulation. Accumulation of viral transcripts (A) and autophagy regulating gene transcripts (B) in A549 cells at early (1-3 hpi), mid (6-8 hpi), and late stage (12 hpi) of the viral replication cycle at two multiplicities of infection (MOI) as determined by RNA-seq analysis (FDR-corrected  $p < 0.01$ ). Dendrograms of the hierarchical clustering of DEG (B) show significant difference in gene expression dynamics at the two MOIs. Schematic of the autophagy pathway (C) showing key regulatory proteins involved in each step of autophagosome formation.

1  
2  
3  
4  
5  
6  
7  
8  
9  
10  
11  
12  
13  
14  
15  
16  
17  
18  
19  
20  
21  
22  
23  
24  
25  
26  
27  
28  
29  
30  
31  
32  
33  
34  
35  
36  
37  
38  
39  
40  
41  
42  
43  
44  
45  
46  
47  
48  
49  
50  
51  
52  
53  
54  
55  
56  
57  
58  
59  
60

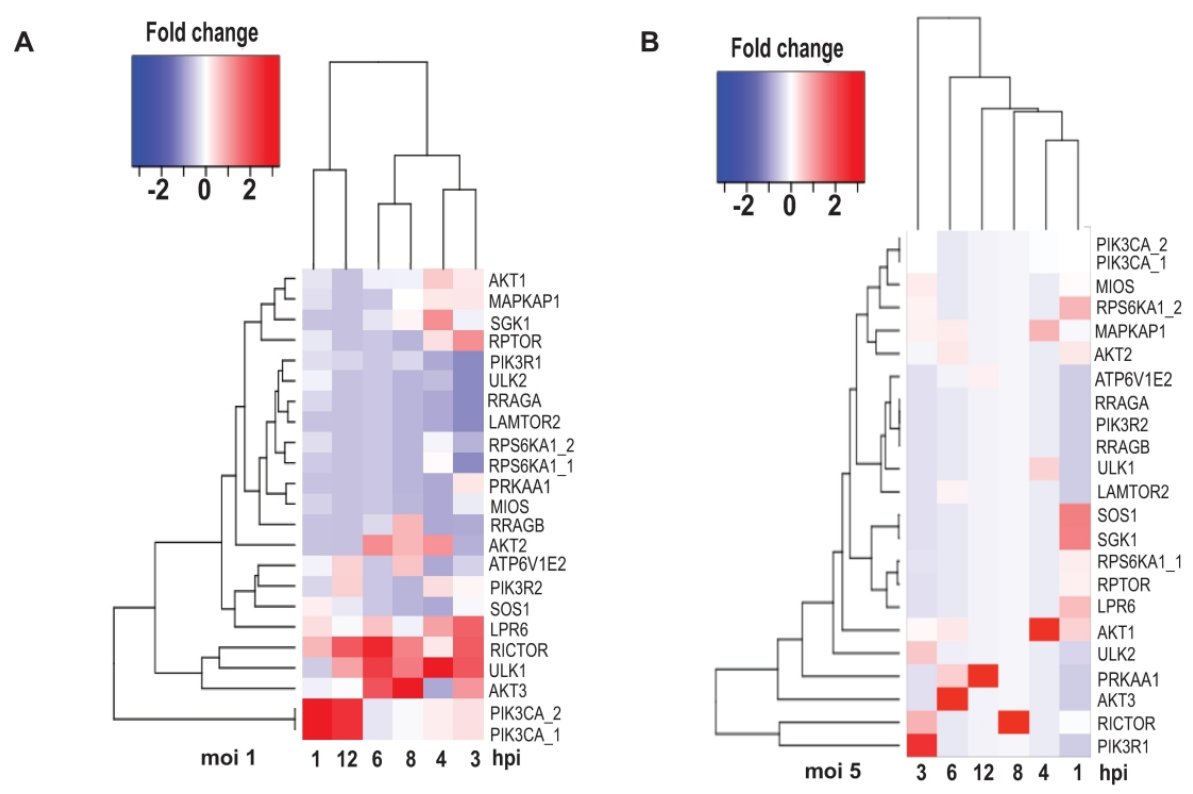

**Figure 2**

Figure 2. Transcriptional activation of mTORC and ULK1 pathways in IAV-infected A549 cells. Gene activation dynamics were determined in A549 cells infected with IAV P/Ch/1/73 at MOI1 and MOI5 versus mock treated cells at 1, 3, 4, 6, 8, and 12 hpi. Fold change differences of gene expression levels in IAV-infected relative to mock-treated cells are statistically significant between the two groups (FDR-corrected  $p < 0.01$ ).

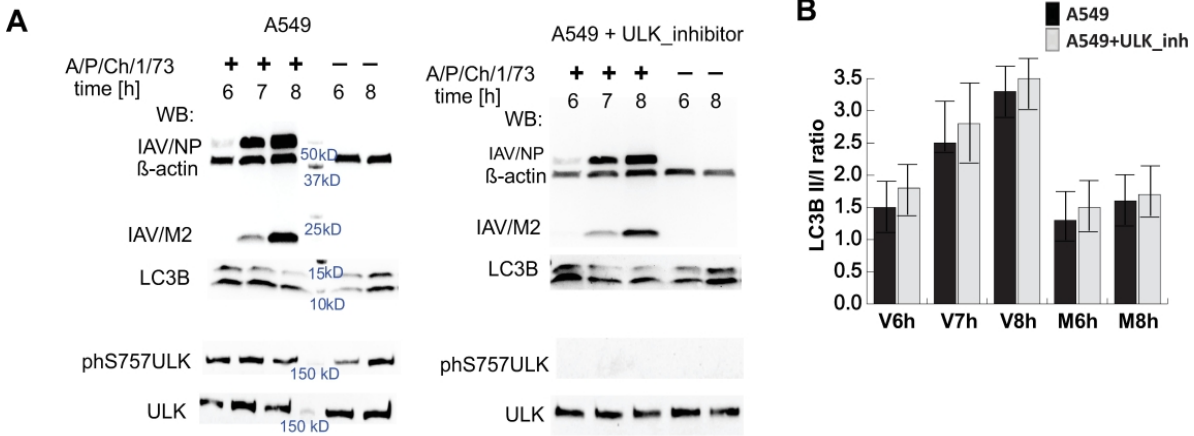

**Figure 3**

Figure 3. Activation of autophagy in IAV P/Ch/1/73 infected A549 cells is not dependent on ULK-S757 phosphorylation by mTORC1. (A) Western blot analysis was performed on total protein isolated from IAV-infected (+) and mock-treated (-) A549 cells at mid (6 hpi) and later stage (7-8 hpi) of virus replication cycle. The ratio between lipidated (LC3B-II) and unprocessed (LC3B-I) forms of MAP1LC3B protein was used to determine the autophagy activation event. The activation status of mTOR and ULK1 proteins was determined as ratio between the mTOR-S2448 and ULK1-S757 phosphorylated versus respective total proteins. Untreated and SBI0206965 [10  $\mu$ M] treated A549 cells were infected with IAV P/Ch/1/73 at MOI5 and total protein was collected at the indicated hours post infection (hpi) together with the time-matched mock treated samples. Accumulation of the viral nucleoprotein (NP) and matrix 2 (M2) protein was analyzed relative to beta-Actin protein levels. (B) Quantitative analysis of protein band densities was performed on five independent experiments with Image Lab 6.0 (BioRad). Shown are the mean and standard deviations.

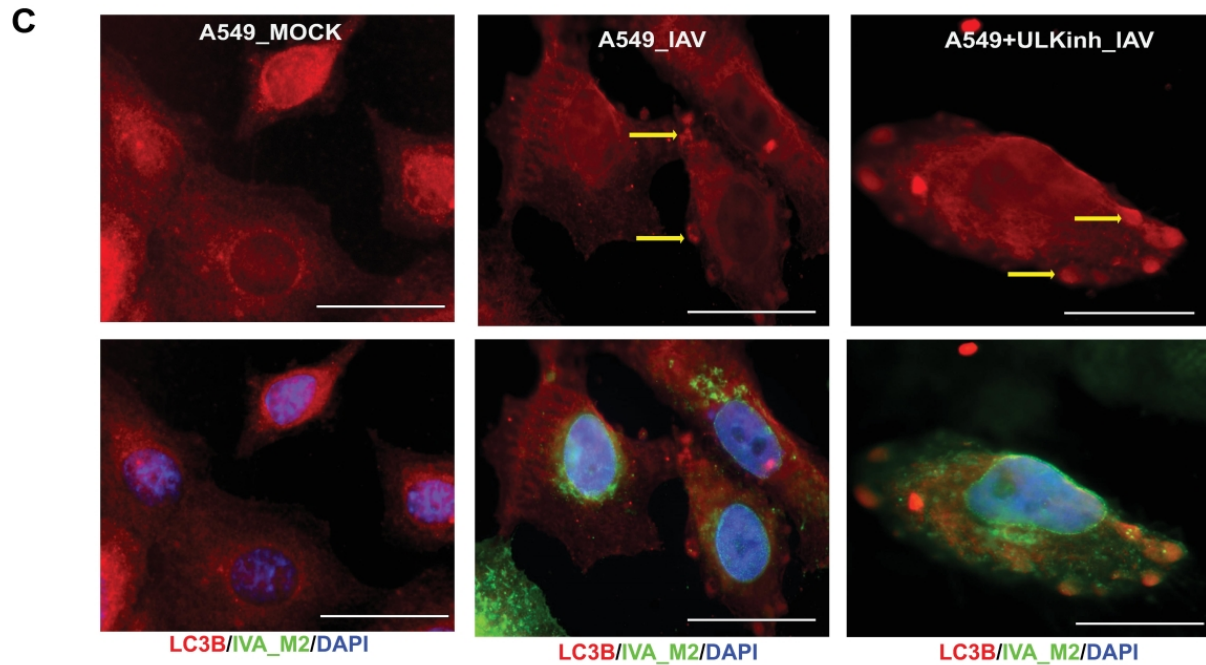

**Figure 3**

Fig. 3 (C) Fluorescent microscopy of A549 cells mock-treated or infected with IAV P/Ch/1/73 at MOI5. A549 cells treated with the ULK inhibitor, SBI0206965 [ $10^{-6}$ ]M were equally infected and processed. Cells were fixed 8 hpi and were treated with primary antibodies against LC3B protein (red) and IAV matrix 2 (green). The cell nuclei were stained with DAPI (blue). The yellow arrows indicate at autophagosome formations. The white scale bar corresponds to 10  $\mu$ m. Shown is a representative of 3 independent biological replicas of IAV infected A549 cells.

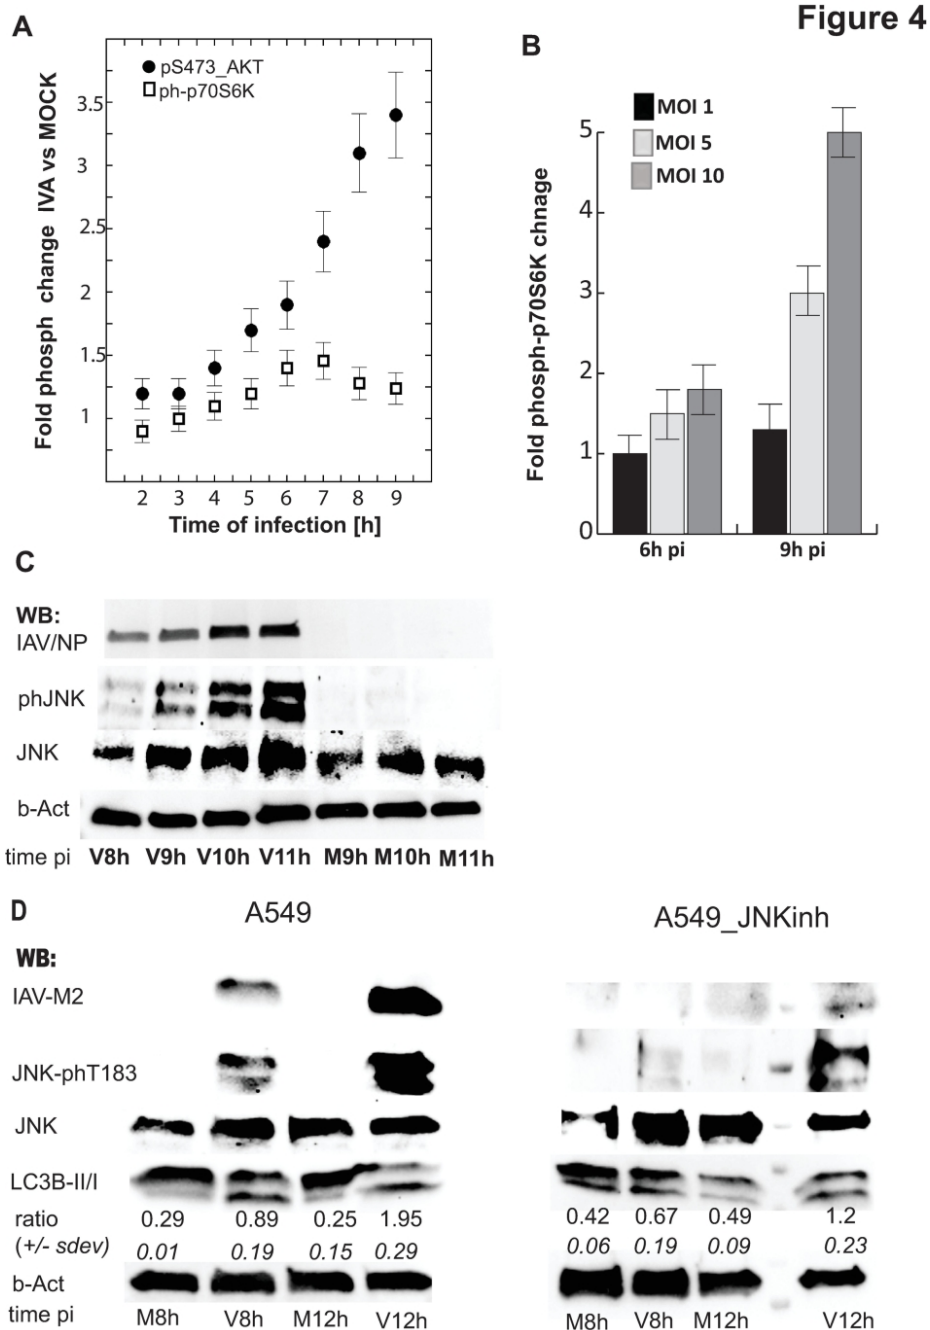

Figure 4. Phosphorylation of SAPK/JNK-Thr183/Tyr185 coincides with AKT-pSer473 anti-apoptotic signaling and is essential for viral protein accumulation in IAV P/Ch/1/73 infected A549 cells. (A) The mTORC1 and mTORC2 activity was deduced from the phosphorylation status of their corresponding substrates, p70S6K-Thr389 and AKT-S473, in IAV-infected (MOI1) cells. (B) mTORC1 activity was measured at later stage of IAV infection (6 and 8 hpi) at MOI 1, 5, and 10. (C) Western blot analysis of phosphorylated JNK-Thr183/Tyr185, total JNK, and IAV nucleocapsid protein (IAV-NP) in samples isolated from virus-infected (V) A549 cells at MOI5 and mock-treated (M) cells. JNK signaling was consequently activated with accumulation of viral protein at mid-to-late stage of the virus replication cycle. (D) Western blot analysis shows that chemical inhibition of SAPK/JNK signaling with SP600125 [10  $\mu$ M] resulted in inhibition of virus protein (IAV-M2) accumulation in A549 cells. In the same samples, increase in the LC3B-II/LC3B-I ratio indicate that high viral protein levels are responsible for the SAPK/JNK and autophagy activation. Shown is a representative of four independent virus infection (MOI5) experiments.

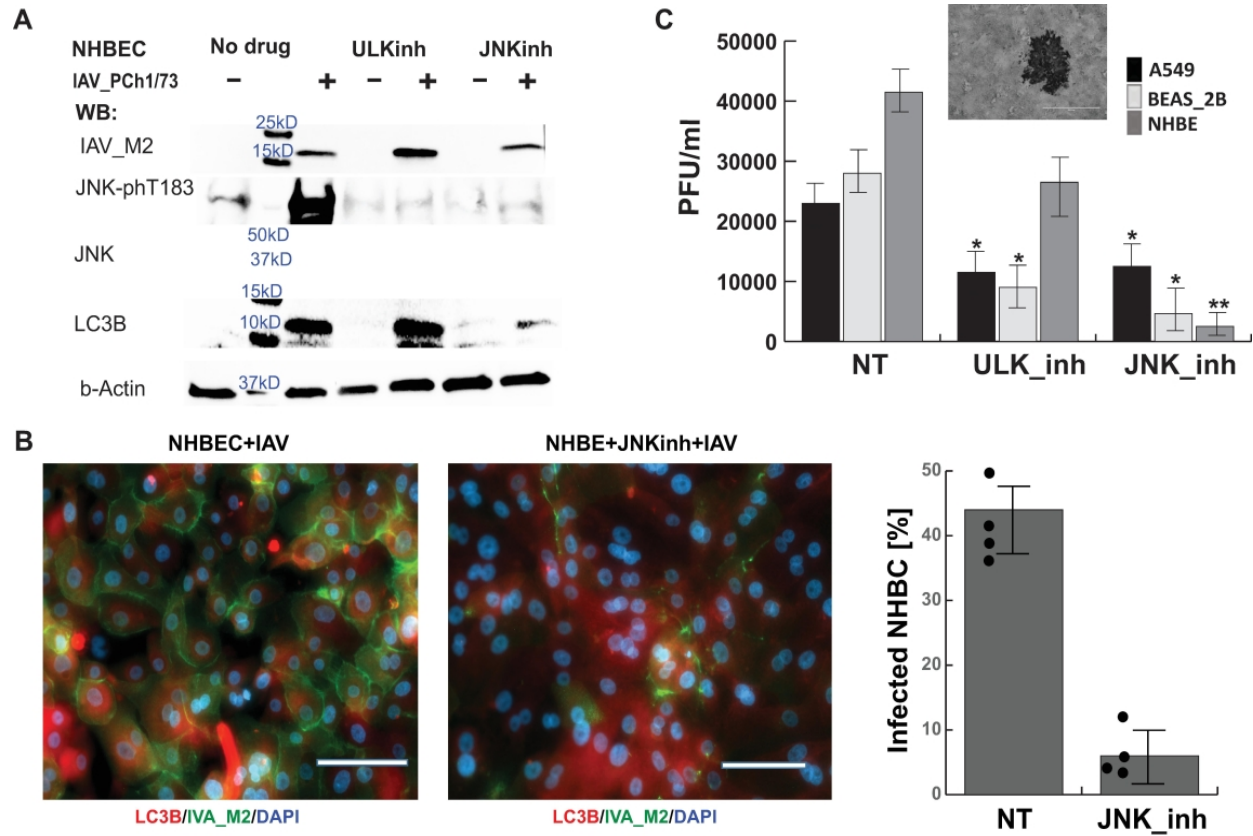

Figure 5. Non-cancer lung bronchial epithelial cells exhibit higher dependence on JNK signaling for production of infectious IAV particles. (A) Chemical inhibition of ULK (SBI0206965 [1  $\mu$ M]) and JNK (SP600125 [5  $\mu$ M]) signaling showed divergent effects on the production of viral protein and LC3B in normal human bronchial epithelial cells (NHBE). Shown is a representative of three independent Western blot experiments of later stage (24 hpi) IAV infection at MOI5. (B) Immunofluorescence with antibodies targeting LC3B and IAV protein M2 demonstrated the effect of JNK-phT183 inhibition on the reduction of virus-infected NHBE. Images were acquired 24 hpi at MOI5. The white scale bar corresponds to 60  $\mu$ m. The graph presents the percent of cells harboring viral M2 protein. Image quantification of IAV-M2-labeled cells was performed on > 300 cells in random fields for four independent infection experiments. (C) Inhibition of virus protein synthesis was consistent with reduction of infectious virus load, measured as plaque forming units per mL conditioned media (PFU/mL), generated by A549, BEAS-2B, and NHBE treated with inhibitors of ULK or JNK signaling compared to the not treated (NT) controls. The PFU/mL were determined 40 hpi with IAV-A/PCh/1/73 at MOI5. The statistical significance of the results was determined from four independent infection experiments with Student t-test (\*  $p < 0.01$  and \*\*  $p < 0.001$ ).

1  
2  
3  
4  
5  
6  
7  
8  
9  
10  
11  
12  
13  
14  
15  
16  
17  
18  
19  
20  
21  
22  
23  
24  
25  
26  
27  
28  
29  
30  
31  
32  
33  
34  
35  
36  
37  
38  
39  
40  
41  
42  
43  
44  
45  
46  
47  
48  
49  
50  
51  
52  
53  
54  
55  
56  
57  
58  
59  
60

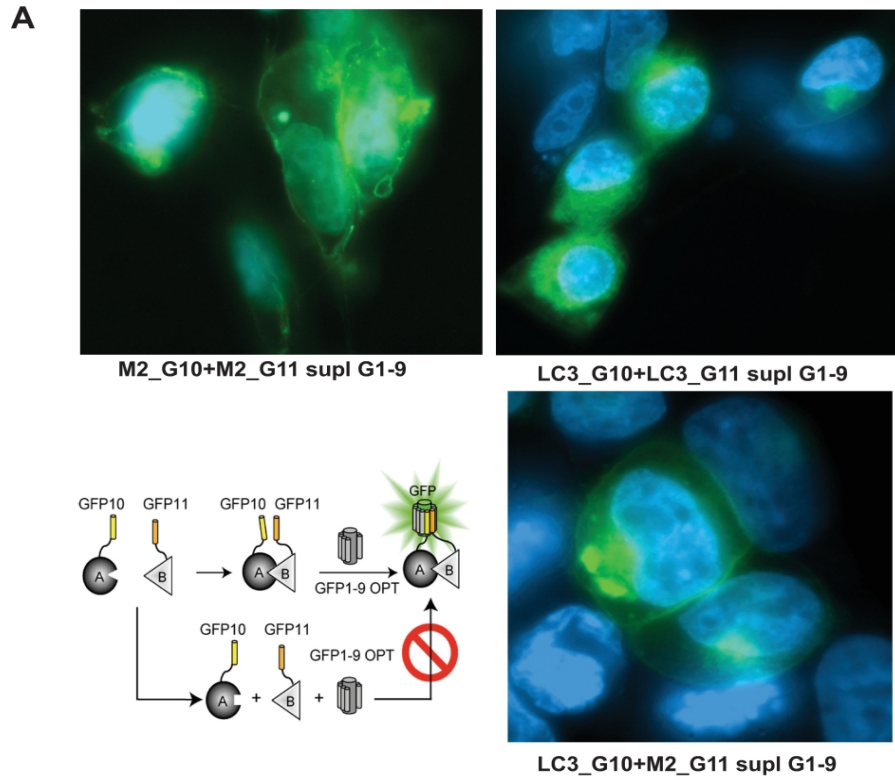

**Figure 6**

Figure 6. IAV-M2 recruits LC3B in the cell membranes. Fluorescent microscopy of HEK293T cells transfected with plasmids expressing G10- and G11-tagged IAV-M2 and LC3B proteins demonstrate that direct interaction between the two proteins occur on the cell plasma membrane or intracellular membranous vesicles. Shown are images of split-GFP complementation assay 48 hours after transfection of HEK293T cells with the corresponding plasmids. The GFP1-9 scaffold was supplied as purified and folded protein in fixed and permeabilized cells.



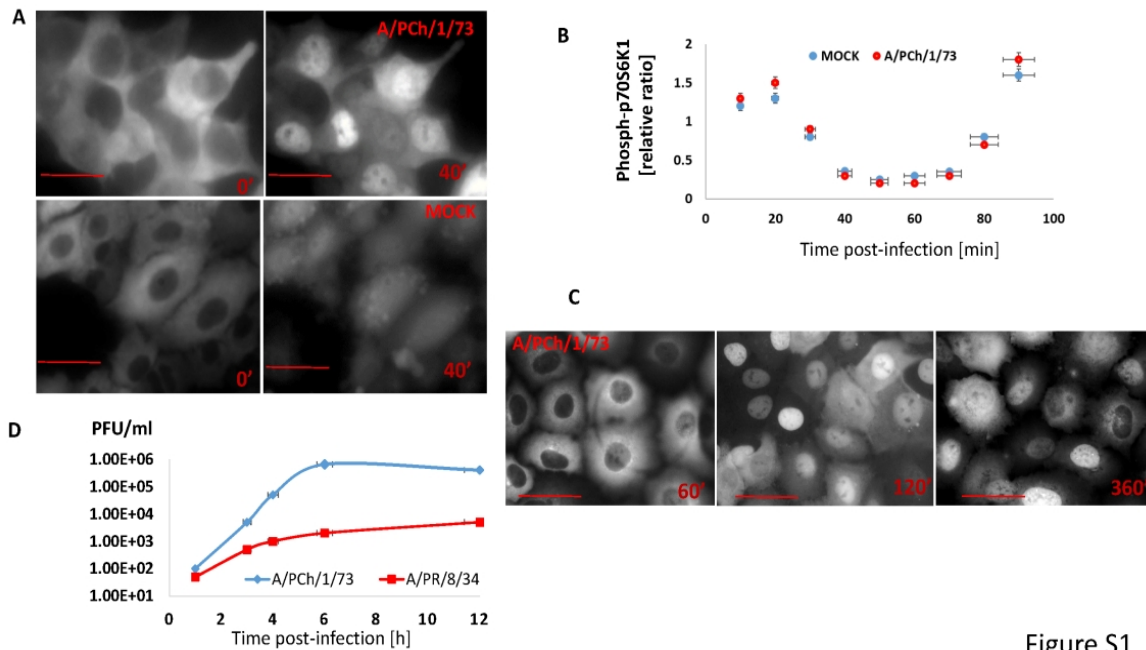

Figure S1

Figure S1: Microscopic analysis of TFEB cellular localization in serum sufficient and serum starved A549 cells infected with IAV A/Port Chalmers/1/73 (H3N2) at MOI1. Time laps microscopy of A549 cell line with stable expression of TFEB fused to GFP demonstrated that the autophagy regulating transcription factor localized within the cell nucleus within 40 min of serum starvation during the virus absorption phase in both virus infected and MOCK-treated cells (A). The scale bar equals 10 $\mu$ m. The phosphorylated levels of mTORC1 substrate, ribosomal protein p70S6K1, sharply decreased in both IAV infected and MOCK-treated cells during the virus absorption phase in serum-depleted media (B). ELISA data from three independent infection experiments presents the ratio between sample absorbance at each indicated time point relative to time-0 sample absorbance. The replication efficiencies of H3N2 and H1N1 (A/Puerto Rico/8/34) IAV subtypes varied significantly in A549 cell line (D) as measured by plaque forming units assay (PFU). Shown are the results from three independent infection experiments at MOI 5. Time-lapse microscopy of A549 cell line with stable expression of TFEB-GFP showed accumulation of the autophagy master regulator in the cell nucleus on the second hour of infection that followed the 1h (60") virus absorption phase (E) in serum replete medium. The scale bar equals 10 $\mu$ m.

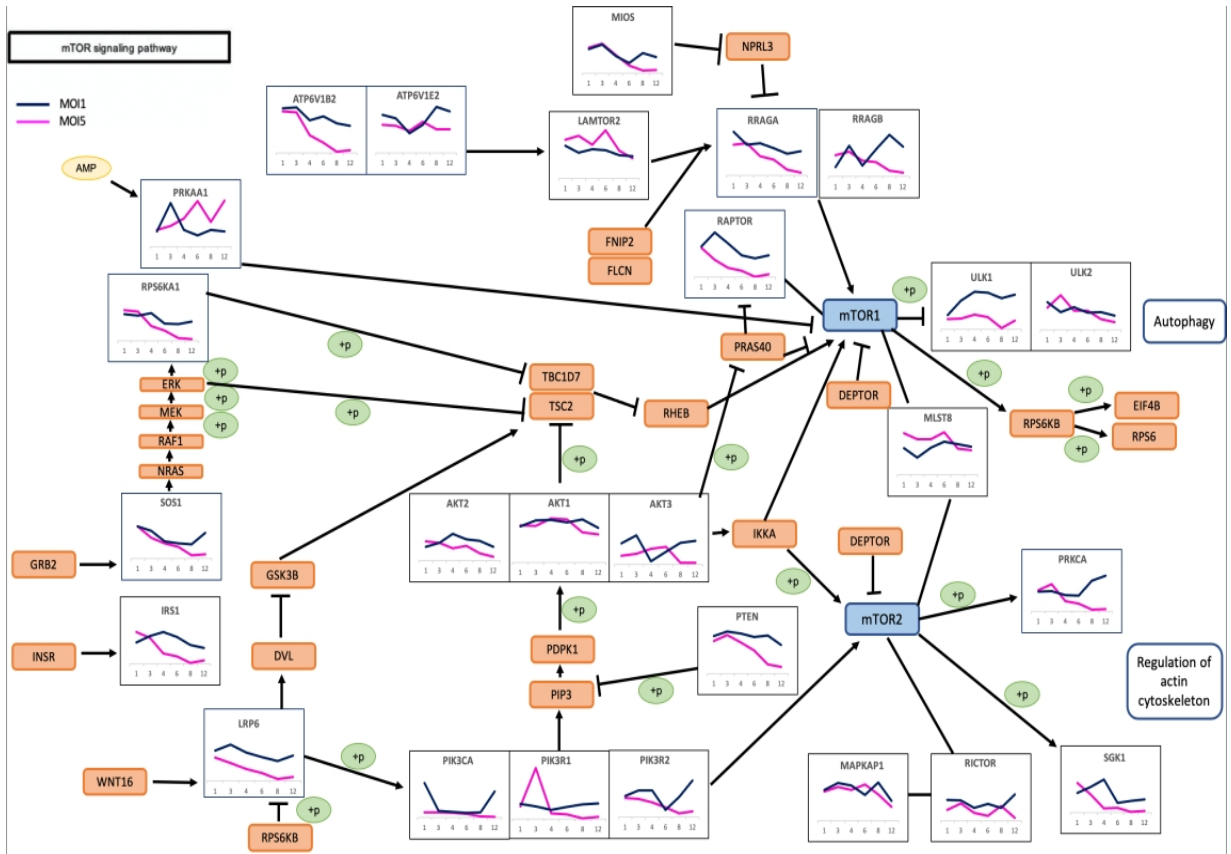

Figure S2: Schematic presentation of mTORC signaling pathways with differential activation patterns of key regulatory genes at 1 and 5 MOI of IAV A/Port Chalmers/1/73 (H3N2)

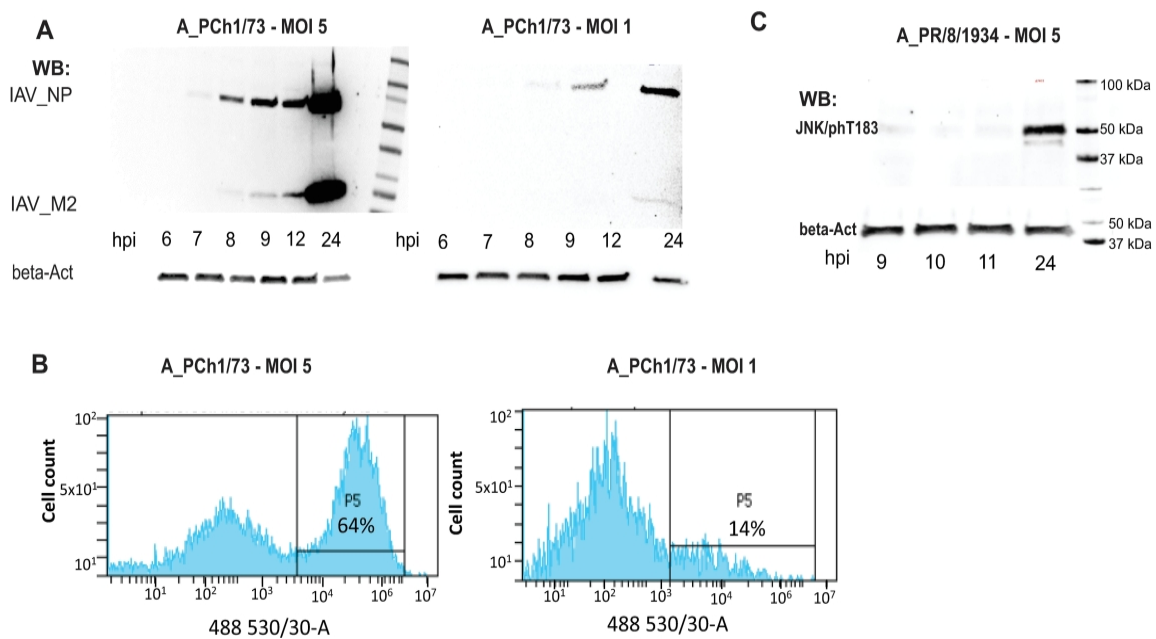

Figure S3: (A) Western blot (WB) analysis of IAV protein accumulation, NP and M2, and (B) flow cytometry analysis of infected A549 cells at two different MOIs demonstrate the limitations of WB sensitivity when protein accumulation dynamics are studied. (C) Western Blot analysis of phosphorylated Thr183-JNK accumulation in A549 cells infected with the IAV H1N1 subtype (MOI 5) reveals correlation between host cell permissiveness to virus replication and activation of JNK signaling. Shown is a representative of three independent virus infection experiments.
